**1D MinION sequencing for large-scale species discovery: 7000 scuttle flies (Diptera: Phoridae) from one site in Kibale National Park (Uganda) revealed to belong to >650 species**

**Amrita Srivathsan<sup>1</sup>, Emily Hartop<sup>2,5,6</sup>, Jayanthi Puniamoorthy<sup>1</sup>, Wan Ting Lee<sup>1</sup>, Sujatha Narayanan Kutty<sup>1,4</sup>, Olavi Kurina<sup>3</sup>, Rudolf Meier<sup>1,4\*</sup>**

<sup>1</sup> Department of Biological Sciences, National University of Singapore, 14 Science Drive 4

<sup>2</sup> Zoology Department, Stockholms Universitet, Stockholm, Sweden

<sup>3</sup> Estonian University of Life Sciences, Kreutzwaldi 5D, Tartu, Estonia

<sup>4</sup> Tropical Marine Science Institute, National University of Singapore, Singapore

<sup>5</sup> Station Linné, Öland, Sweden

<sup>6</sup> Naturhistoriska Riksmuseet, Stockholm, Sweden

**\*Corresponding author:** Rudolf Meier: [meier@nus.edu.sg](mailto:meier@nus.edu.sg)

Other email addresses:

Amrita Srivathsan: [asrivathsan@gmail.com](mailto:asrivathsan@gmail.com)

Emily Hartop: [emhartop@gmail.com](mailto:emhartop@gmail.com)

Jayanthi Puniamoorthy: [dbsjay@nus.edu.sg](mailto:dbsjay@nus.edu.sg)

Wan Ting Lee: [dbslwt@nus.edu.sg](mailto:dbslwt@nus.edu.sg)

Sujatha Narayanan Kutty: [tmssunk@nus.edu.sg](mailto:tmssunk@nus.edu.sg)

Olavi Kurina: [Olavi.Kurina@emu.ee](mailto:Olavi.Kurina@emu.ee)

**Keywords:** NGS barcoding, DNA barcoding, Nanopore sequencing, MinION, large-scale species discovery

1 **ABSTRACT**

2

3 Background: Most animal species remain to be discovered. We recently proposed to tackle this  
4 problem using a 'reverse workflow' where all specimens are barcoded via tagged amplicon  
5 sequencing and then sorted into putative species (mOTUs). We furthermore suggested that the  
6 COI barcodes can be obtained with minimal laboratory equipment using MinION sequencing, but  
7 our test with 1D<sup>2</sup> reads only yielded 500 barcodes per flowcell.

8

9 Results: Here we show how MinION 1D sequencing can be used to obtain ~3500 COI barcodes  
10 per flowcell. Based on 7062 MinION barcodes for a hyper-diverse family of flies (Diptera:  
11 Phoridae) collected by one trap in Kibale National Park, Uganda, we discover ~650 species which  
12 exceeds the number of phorid species described for the entire Afrotropical region. Our updated  
13 MinION pipeline increases processing speed via parallelization, improves demultiplexing, and yet  
14 yields reliable barcodes (99.99% accuracy) and similar mOTUs as Illumina sequencing (match  
15 ratio: 0.989). Morphological examination of 100 mOTUs confirms good congruence (93% of  
16 mOTUs; >99% of specimens). Nearly 90% of species and specimens belong to the megadiverse  
17 genus *Megaselia* which is routinely neglected because its species diversity and abundance is too  
18 overwhelming. We show that it can be tackled with the reverse workflow. We also illustrate how  
19 the molecular data guides the description of a new species: *Megaselia sepsioides* sp. nov..

20

21 Conclusions: MinION is suitable for reliable, rapid, and large-scale species discovery in  
22 hyperdiverse taxa. Approximately, 3500 specimens can be sequenced using one MinION flowcell  
23 at a barcode cost of <0.35 USD.

24

25

## 26 INTRODUCTION

27 Most life on earth has yet to be discovered with an estimated 80% of extant species being still  
28 unknown to science [1]. The majority of these species belong to hyper-diverse and species-rich  
29 invertebrate clades. These taxa are ubiquitous, contain most of the multicellular animal species,  
30 and often occur in great abundance. However, new species are difficult to find and delimit for  
31 because it requires the study of thousands of specimens. Typically, this process starts with  
32 sampling specimens with bulk trapping methods (e.g. Malaise trap, fogging, pitfall traps, flight  
33 intercept traps). It usually yields thousands of specimens per site that need to be sorted: first to  
34 higher-level taxonomic groups by parataxonomists and then to species-level by taxonomic  
35 experts. The latter work has to be carried out by taxonomic experts because species-level sorting  
36 by parataxonomists tends to yield unreliable results [2]. Once morpho-species have been  
37 obtained, they are then often tested via DNA barcodes (658 bp fragment of COI) by sequencing  
38 a few representative specimens for each morpho-species [3]. This traditional workflow works well  
39 for taxa with small numbers of species and specimens but is so time-consuming for hyperdiverse  
40 and abundant clades that they are neglected. This is partially responsible for our lack of baseline  
41 data for many insect taxa. The traditional workflow has the additional downside that  
42 morphologically cryptic species are overlooked. This is particularly likely to happen when  
43 expensive Sanger sequencing is used because only few specimens can be barcoded and the  
44 probability of detecting cryptic species is low [4].

45  
46 An alternative approach to species discovery is the 'reverse workflow' where every specimen in  
47 a sample is individually sequenced (or barcoded) without the destruction of the specimen [4-6].  
48 The specimens are then grouped to molecular Operational Taxonomic Units (mOTUs) based on  
49 DNA barcodes. The morphological check of the putative species delimited with DNA barcodes  
50 comes last. The taxonomic expert works on pre-sorted material and rectifies mis-sorted  
51 specimens, identifies known species, and describes new species. This would have been deemed

52 unrealistically expensive prior to the advent of the High Throughput Sequencing technologies.  
53 However, sequencing platforms like Illumina and PacBio are sufficiently cost-effective and are  
54 now replacing barcoding via expensive Sanger sequencing [4, 5, 7-10]. For example, sequencing  
55 tens of thousands of specimens with Illumina HiSeq can cost as little as 0.17 USD per specimen  
56 (including PCR cost, see discussion in Wang et al., 2018 [4]). However, Illumina and PacBio  
57 sequencing have some downsides. They are only cost-effective if >10,000 specimens have to be  
58 barcoded, sequencing usually has to be outsourced (i.e., the amplicons have to be shipped to a  
59 sequencing facility), and it often takes weeks to obtain data. It would be desirable to have  
60 alternatives that are fast, scalable, and yet cost-effective. This would be particularly useful if  
61 barcoding has to be accomplished under field conditions or in countries with limited access to  
62 Illumina and PacBio sequencing [4, 5, 11, 12]. This is frequently the case and we therefore  
63 strongly believe that the democratization of large-scale DNA barcoding will be important for  
64 upscaling species discovery across the globe and encouraging the use of the reverse workflow  
65 across many labs.

66  
67 Oxford Nanopore's MinION has the potential to help with achieving these goals. It is a low-cost  
68 and portable real-time sequencing device. However, its use and reliability for large scale  
69 specimen handling remains to be fully understood. We recently showed that 500 reliable DNA  
70 barcodes can be obtained using 1D<sup>2</sup> sequencing on one flowcell of MinION. To our knowledge  
71 this was the highest number of products that were successfully multiplexed in a single MinION  
72 flowcell (5X higher than a study which examined ~100 amplicons of rDNA [11]) but such low  
73 throughput still meant that the cost per barcode remained high (ca. 2 USD: [13]). While this scale  
74 is useful for many species' identification projects, it is unlikely to be effective for large-scale  
75 species discovery where samples can contain thousands of specimens. Furthermore, the 500  
76 specimens were barcoded using 1D<sup>2</sup> sequencing which requires a complicated library  
77 preparation, base-calling is computationally intensive, and application to amplicon sequencing is

78 still under development. Unfortunately, it remained untested whether the more straightforward,  
79 but less accurate 1D sequencing can be used for large-scale species discovery. This is addressed  
80 in this manuscript.

81

82 However, we are here not only developing ways to use of MinION 1D sequencing for barcoding.  
83 Instead, we are also investigating the curious observation that only 466 species of phorid flies  
84 have been recorded for the Afrotropical Region [14]. Phoridae is a hyper-diverse clade belonging  
85 to the true flies (Diptera). Diptera is one of several hyper-diverse insect orders that also include  
86 beetles (Coleoptera), bees, wasps, and ants (Hymenoptera), and moths and butterflies  
87 (Lepidoptera). The species estimates for all of Insecta vary between 3 and 13 million (reviewed  
88 by Stork, 2018 [15]) with only ca. 1,000,000 currently being described [16]. Historically, the  
89 *inordinate fondness* of taxonomists for beetles has led to Coleoptera outpacing Diptera and  
90 Hymenoptera in numbers of described species. However, several recent studies suggest that  
91 Hymenoptera and Diptera are likely to be more species-rich. For example, Forbes et al. [17]  
92 hypothesize that Hymenoptera contained more species than either Diptera or Coleoptera based  
93 on parasite host ratios for Microhymenoptera, but this study showed an underappreciation for  
94 both the great numbers of Dipteran parasitoids and the diversity of true flies in general. Indeed,  
95 Diptera has recently been proven to be surprisingly rich in a number of large-scale biodiversity  
96 studies. In a large barcoding study of Canadian insects, Hebert et al. [18] found that Hymenoptera  
97 and Diptera together accounted for two thirds of the 46,937 BINS acquired and predicted that one  
98 dipteran family (Cecidomyiidae) has 16,000 species in Canada. The authors then extrapolated to  
99 the worldwide fauna which they estimated to be 10 million insect species, of which 1.8 million  
100 were predicted to be cecidomyiids [18]; i.e., a single family of Diptera may surpass the number of  
101 described species in all of Coleoptera. Other studies similarly hint at the extraordinary richness of  
102 Diptera. The Zurqui All Diptera Biodiversity Inventory (ZADBI) of a single site in Costa Rica was  
103 heavily reliant on specimens collected with two Malaise traps run for a one-year period [19]. Only

104 41,001 specimens (a small fraction of the hundreds of thousands collected) could be studied by  
105 taxonomic experts [20]. The specimens that were examined revealed 4,332 species of Diptera,  
106 of which 800 were from Cecidomyiidae and 404 were for Phoridae [20], the fly family of focus  
107 here.

108

109 Phoridae, or scuttle flies, are a worldwide family of true flies with approximately 4300 described  
110 species [14]. Over 1600 of these are in the giant genus *Megaselia* Rondani, which has been  
111 described as “one of the largest, most biologically diverse and taxonomically difficult genera in  
112 the entire animal kingdom” [21]. In groups like *Megaselia*, the species discovery problem appears  
113 insurmountable. Extremely large numbers of specimens are routinely collected, and they can  
114 belong to very large numbers of species. Even in urban and suburban habitats, the diversity of  
115 the family can be surprisingly high. Henry Disney, a world expert on the family, has recorded 75  
116 species of phorids (48 of *Megaselia*) in his modest suburban garden [22]. Similarly, the BioSCAN  
117 project in Los Angeles found that backyards in the city supported as many as 82 species [22]. In  
118 natural areas, the diversity and abundance tend to be much higher and sorting such samples into  
119 species-level units using traditional workflows is very labor-intensive. Rare and new species are  
120 often hidden among very large numbers of common and described species. The study of groups  
121 like *Megaselia* requires examination of thousands of specimens for which prodigious notes have  
122 to be taken as specimens are compared. Many detailed drawings are prepared (for *Megaselia*  
123 drawings of male genitalia are essential) – often based on dissections and slide mounts – because  
124 many known/common species cannot be identified without detailed inspection. The process can  
125 take hours, days, or longer for a single species discovery. This traditional workflow thus often  
126 discourages all but the most tenacious taxonomists from taking up the study of hyper-diverse  
127 genera within insects.

128

129 Here, we test whether 1D MinION sequencing may offer a rapid and revolutionary approach to  
130 exploring phorid diversity more comprehensively. MinION sequencing is here applied to ca. 30%  
131 of the phorid specimens that were collected in a single Malaise trap in Kibale National Park,  
132 Uganda. We here describe how we processed ~8700 specimens, obtained ~7000 accurate  
133 barcodes, and found 650 species (of which almost 90% are *Megaselia*). All this could be  
134 accomplished using a workflow that requires less than a month.

135

## 136 **RESULTS**

### 137 **MinION based DNA barcoding**

138 The experiment was designed to obtain full-length COI barcodes for two sets of specimens via  
139 tagged amplicon sequencing. A total of 8699 specimens were processed (Set 1: 4275; Set 2:  
140 4519; 95 specimens were shared between the sets) (Fig. 1). In order to assess amplification  
141 success rates, a subset of PCR products for each of the ninety-two 96-well plates were assessed  
142 with agarose gels. The extrapolated amplification success rates were 86% and 74% for the two  
143 sets of specimens (80.7% overall); i.e., we estimated that >3600 and >3300 DNA barcodes should  
144 be obtainable via MinION sequencing given that gels tend to underestimate amplification success  
145 rates (Table 1). The PCR products for each set were pooled and sequenced using MinION (set  
146 1: 7,035,075; set 2: 7,179,121 1D nanopore reads). Both sets were sequenced in two sequencing  
147 runs. The first run for each set was based on the pooled PCR products for all specimens in the  
148 sets. It generated 3,069,048 and 4,853,363 reads, respectively. The results of the first run were  
149 used to estimate coverage for each PCR product. Products with weak coverage (<50x) were re-  
150 pooled and re-sequenced (set 1: 2172 amplicons; set 2: 2211 amplicons). This added 3,966,027  
151 and 2,325,758 reads to each set and improved the coverage of many low-coverage barcodes  
152 (Fig. 2). The combined data were processed using an improved version of the bioinformatics  
153 pipeline in Srivathsan et al. [13]. The improvements led to a higher demultiplexing rate (14%

154 increase for set 1: 898,979 vs. 787,239 reads; 9% increase for set 2: 647,152 vs. 593,131 reads)  
155 and faster demultiplexing (10X using 4 cores: demultiplexing in 9 min vs 87 min for one of the  
156 datasets).

157 Demultiplexing of all data and preliminary barcode calling revealed 3,797 and 3,476 MAFFT  
158 barcodes with  $\geq 5X$  coverage and  $< 1\%$  ambiguous bases. These barcodes were subject to  
159 correction using RACON [23] which yielded the same number of barcodes. When the barcodes  
160 for the two sets of samples were combined, we overall obtained 7,220 MAFFT and RACON  
161 barcodes. These preliminary barcodes still contain indel and substitution errors that were  
162 addressed with an amino-acid correction pipeline that was first implemented in Srivathsan et al.  
163 [13]. It yielded 7,178 MAFFT+AA and 7,194 RACON+AA barcodes. Some barcodes were not  
164 retained because this pipeline rejects barcodes that have five or more consecutive indel errors.  
165 Finally, the two sets of corrected barcodes were consolidated. This yielded a set of 7,115  
166 consolidated barcodes. We rejected barcodes where the alignment of MAFFT+AA and  
167 RACON+AA barcodes required the insertion of indels, as the +AA barcodes are expected to be  
168 indel-free. Such indels in the alignments of MAFFT+AA and RACON+AA barcodes also indicate  
169 discrepancies between MAFFT and RACON barcode estimates and there is no objective reason  
170 to prefer one barcode over the other. The overall barcoding success rate was thus 81.9% (7,115  
171 barcodes for 8,699 specimens). This was close to the expected 80.7% success rate based on gel  
172 electrophoresis; i.e., MinION sequencing consistently produced sequence data for successfully  
173 amplified products. A subsequent contamination check via BLAST revealed that of the 7,115  
174 barcodes, 53 barcodes were unlikely to pertain to phorid flies ( $< 1\%$ ) and we thus retained 7,062  
175 barcodes for species richness estimation. Lastly, we inspected the reads obtained for the 92  
176 negative controls (1 per microplate). Five negatives yielded MAFFT barcodes. Four of these had  
177 a  $> 97\%$  match to non-phorids (two humans, one fish, one mollusc) and were eliminated. One low  
178 coverage (13X) negative survived all filters and matched phorid COI. It was removed after



179 ascertaining that it did not impact the accuracy of the barcodes in the plate. This could be tested  
180 by comparing the MinION barcodes for the plate with Illumina barcodes obtained from different  
181 PCR products for the same DNA extraction plate (see below).

## 182 **Accuracy and selection of barcode sets**

183 To find the best strategy for obtaining accurate barcodes, we compared 5 sets of barcodes  
184 (MAFFT, RACON, MAFFT+AA, RACON+AA, and consolidated barcodes) with the corresponding  
185 barcodes based on Illumina sequencing. Illumina barcodes were obtained for 6,373 specimens  
186 for the same specimens using different primers that amplified a 313 bp subset of the full-length  
187 barcodes. The comparisons showed that the uncorrected MAFFT and RACON barcodes had an  
188 accuracy of 99.61% and 99.51% (Table 2). Correction of these barcodes using the amino-acid  
189 correction pipeline improved the accuracy considerably (>99.9% in all cases). The barcodes were  
190 corrected after testing several “namino” parameters. Overall, namino=2 was found to yield the  
191 most accurate barcodes, and minimized the number of inaccurate barcodes. We found that  
192 MAFFT+AA barcodes were more accurate than RACON+AA barcodes, but MAFFT+AA barcodes  
193 contained a much higher number of ambiguous nucleotides (Fig. 3). When RACON+AA and  
194 MAFFT+AA barcodes were consolidated, the resulting “consolidated barcodes” were found to be  
195 highly accurate (99.99%) and contained few ambiguous bases (median = 0.3 %).

196 We furthermore compared the mOTU richness estimated by the different barcode sets. mOTU  
197 richness was very similar across MinION and Illumina barcodes for the consolidated and  
198 uncorrected MAFFT/RACON barcodes. MAFFT+AA barcodes performed well in this comparison,  
199 but yielded fewer mOTUs than Illumina barcodes: this may be due to a higher proportion of  
200 ambiguous nucleotides (Fig. 3). However, comparison of mOTU richness alone does not imply  
201 the same specimens were grouped into mOTUs across MinION and Illumina barcode sets. We  
202 thus also calculated the match ratio for the datasets (3% clustering threshold). We found that all  
203 five barcode sets (MAFFT, RACON, MAFFT+AA, RACON+AA, and consolidated barcodes,

204 namino=2) also had high match ratios (>0.97) with the consolidated barcodes and RACON  
205 barcodes performing best with match ratios of >0.98 (consolidated barcodes: 0.989, RACON:  
206 0.989, RACON+AA: 0.982). However, upon closer inspection only the multiple sequence  
207 alignment (MSA) of the consolidated barcodes was indel-free while the other MSAs contained  
208 indels. The largest number of indels was found in the MSA of uncorrected RACON barcodes  
209 which indicates that the RACON barcodes retain a fair number of indels and may not be of  
210 sufficient quality for submission to sequence databases. Overall, we would thus recommend the  
211 usage of consolidated barcodes as the final barcode set. Because they maximize the per-base  
212 accuracy, estimated mOTU diversity, match ratios, and yield high-quality alignments.

### 213 **Species richness estimation**

214 We thus proceeded to characterize the diversity of the phorid flies collected from the Malaise traps  
215 based on the consolidated barcodes (namino=2). We overall obtained a mean of 683 mOTUs  
216 (2%: 728, 3%: 685, 4%: 636) when the thresholds were varied from 2-4%. Species accumulation  
217 and Chao 1 curves for mOTUs at 3% were not found to have reached a plateau, but the shape of  
218 the curves suggest an estimated diversity is >1000 species in a single site collected by one  
219 Malaise trap (Fig. 4).

### 220 **Congruence with morphology**

221 mOTUs are expected to be affected by mistakes caused by lab contamination and species  
222 delimitation errors due to the biological properties of barcodes. We find that 6 of the 100 clusters  
223 contained a single misplaced specimen and that there was one small cluster of four specimens  
224 that appeared to consist of a mixture three morpho-species. This implies that 9 of the >1500  
225 examined barcoded specimens were misplaced due to lab contamination. mOTUs based on  
226 barcodes are expected to underestimate species for those that recently speciated and  
227 overestimate species with deep splits [24]. This means that taxonomists working with mOTUs

228 should check for signs of lumping and splitting for closely related taxa. Our initial morphological  
229 check of 100 randomly selected clusters (>1500 specimens) took ca. 30 hours. This preliminary  
230 morphological screening covered all specimens while future studies could concentrate on  
231 complex clusters, as any differences that may have occurred within 5% clusters were not  
232 discernible without further preparations (dissection and slide mounting). Identifying these areas  
233 of potential ambiguity is an advantage of this pipeline. It allows taxonomic experts to focus time  
234 and energy on these complex clusters.

235

### 236 **New Species Description**

237

238 A primary aim of the reverse workflow is finding rare new species for description in bulk samples.  
239 With specimens pre-sorted into mOTUs, morphologists have easy access to interesting and  
240 potentially rare species that would otherwise remain undiscovered. While examining the 100  
241 mOTUs, eight specimens were found to belong to a distinctive new species of *Megaselia*. This  
242 species provided a good opportunity to demonstrate how the reverse workflow aids in species  
243 discovery because a mOTU-specific haplotype network informed on which specimens should be  
244 studied with morphology. The species is here described, and the description incorporates the  
245 molecular data.

246

247 *Megaselia sepsioides* Hartop sp. n.

248 urn:lsid:zoobank.org:pub:ED268DF2-A886-4C31-A4FB-6271C382DECE

249

### 250 **Description**

251 See Fig. 5, 6.

252 In an effort to continue reducing redundancy and ambiguity in species descriptions, the  
253 description of this species has excluded the character table from the method previously  
254 established for *Megaselia* [25-27] and uses a barcode and photographic description. Photographs  
255 are a key element in descriptions for large, diverse groups [28], where verbose descriptions can  
256 be both overwhelmingly time consuming and insufficiently diagnostic. Most characters that would  
257 have been in table form are clearly visible in the photographs provided; the few that are not were  
258 deemed irrelevant to either the description or diagnosis of the species.

259

## 260 **Diagnosis**

261 This species is unmistakable even within the gargantuan and taxonomically difficult  
262 genus *Megaselia*. The semi-circular expansion with modified peg-like setae on the forefemur is  
263 unique among described members of the genus (Fig. 5, b). Similarly, the severe constriction of  
264 the hind tibia basally is diagnostic (Fig. 5, c and d). The narrow and elongate form of the abdomen  
265 is notable. Fig. 6 shows variations in setation between haplotypes. Only single specimens of the  
266 two distinct haplotypes are available; more specimens will be necessary to determine if these are  
267 eventually removed as distinct species or fall within a continuum of intraspecific variation.

268 DNA barcode for UGC0005996:

269 actttatattttttggagcttgagctggaatagtaggtacttcttaagaatcataattcgtgctgaattaggacaccaggagcacttat  
270 tggatgaccaaattataatgtgattgttactgcacatgctttattataatTTTTTtagtaaacctattataataggaggTTTTgtaattg  
271 actgtaccttaattattaggagccccagatatggcattccctcgaatgaataatataagTTTTgaatattacctccttcttaactctttatta  
272 gccagaagtatagtagaaaatggagctggaactgggtgaacagtttatcctccttatctctagaatcgctcatagtgagcttctgtgat  
273 ttagcaattttctctctcatttagctggaattcatctatttaggagctgtaaattttattacaacaattattaatatacgatcatcaggtattaca  
274 ttgaccgaatacctctattgtttgatctgtaggtattacagctttattgctactctatcactcctgTTTTtagctggtgctattacaatactattaa  
275 cagaccgaaatttaacttcatttttgaccagcaggaggagatccaattttataccaacatttttc

276

## 277 **Material Examined**

278

279 Holotype:

280 Scientific Name: *Megaselia sepsioides* Hartop 2019; country: Uganda; state Province:  
281 Kamwenge; locality: Kibale National Park: 1530 m; Coordinates: 00°33'54.2"N 30°21'31.3"E;  
282 sampling protocol: Malaise trap; event date: iii-xii, 2010; individual count: 1; sex: male; life stage:  
283 adult: UGC0005996; identified by: Emily Hartop: 2019; institution code: LKCNHM; collection code:  
284 UGC; basis of record: preserved specimen.

285

286 Paratypes:

287 Scientific name: *Megaselia sepsioides* Hartop 2019; country: Uganda; state province:  
288 Kamwenge; locality: Kibale National Park; elevation: 1530 m; coordinates: 00°33'54.2"N  
289 30°21'31.3"E; sampling protocol: Malaise trap; event date: iii-xii, 2010; individual count: 7; sex:  
290 male; life stage: adult; catalog number: UGC0012899, UGC0012244, UGC0012568,  
291 UGC0003003, UGC0005864, UGC0012937, UGC0012971; identified by: Emily Hartop; date  
292 identified: 2019; institution code: LKCNHM; collection code: UGC; basis of record: preserved  
293 specimen

294

## 295 **Distribution**

296 Known from a single site in Kibale National Park, Uganda.

297

## 298 **Biology**

299 Unknown.

300

## 301 **Etymology**

302 Named by Yuchen Ang for the sepsid-like (Diptera: Sepsidae) foreleg modification.

303

304 **DISCUSSION**

305

306 *Large scale species discovery using MinION*

307

308 Our results suggest that MinION's 1D sequencing yields data of sufficient quality for producing  
309 high-quality DNA barcodes that can be used for large-scale species discovery. Through the  
310 development of new primer-tags, sequencing strategies, and improved bioinformatics  
311 procedures, we here increase the barcoding capacity of a MinION flowcell from 500 specimens  
312 (Srivathsan et al., 2018: 1D<sup>2</sup> sequencing) to ~3500 specimens. This is achieved without a drop in  
313 accuracy because the new error correction pipeline is effective at eliminating most of the errors  
314 in the 1D reads (ca. 10%). Indeed, even the initial MinION barcodes (MAFFT & RACON) have  
315 very high accuracy (>99.5%) when compared to Illumina data. Note that this accuracy is even  
316 higher than what was obtained with 1D<sup>2</sup> sequencing in Srivathsan et al. (2018: 99.2%). We  
317 suspect that this partially due to improvements in MinION sequencing chemistry and base-calling,  
318 but our new bioinformatics pipeline also helps because it increases coverage for the amplicons.  
319 These findings are welcome news because 1D library preparations are much simpler than the  
320 library preps for 1D<sup>2</sup>. In addition, 1D<sup>2</sup> reads are currently less suitable for amplicon sequencing  
321 (<https://store.nanoporetech.com/kits-250/1d-sequencing-kit.html>) [29].

322

323 We tested a range of different techniques for obtaining barcodes from 1D reads. Some techniques  
324 are computationally more expensive than others which raises the question of which bioinformatics  
325 pipeline should be used for obtaining accurate barcodes. Based on the current performance of  
326 MinION, we would recommend the usage of the "consolidated barcodes". They contain no indel  
327 errors and fewer substitution errors (99.99% accuracy) when compared to MAFFT+AA and  
328 RACON+AA barcodes. The mOTUs delimited with consolidated barcodes are virtually identical  
329 with the ones obtained via Illumina sequencing (Number of 3% mOTUs for Illumina: 661; MinION:

330 658; match-ratio: 0.989). In addition, consolidated barcodes were also the most accurate  
331 barcodes based on 1D<sup>2</sup> reads [13]. Nevertheless, we found that all barcode sets gave reliable  
332 mOTU estimates. For corrected barcodes (MAFFT+AA and RACON+AA) this was consistent with  
333 >99.9% per base accuracy, but the higher error rates of the uncorrected barcodes rarely affected  
334 mOTU estimates. This is because indels were treated as missing data and mOTU estimation only  
335 requires accurate estimates of distances for closely related taxa. This explains why the 99.5%  
336 accurate RACON barcodes can group specimens into mOTUs in a very similar manner to what  
337 is obtained with Illumina barcodes (match ratio of >0.98). The results imply that accurate mOTU  
338 estimates can be obtained even based on preliminary barcodes.

339

340 Based on the procedures described here, MinION barcodes can be generated rapidly and at a  
341 low sequencing cost of <0.35 USD per barcode. These properties make MinION a valuable tool  
342 for species discovery whenever a few thousand specimens have to be sorted to species (<5000).  
343 Even larger-scale barcoding is probably still best tackled with Illumina short-read or PacBio's  
344 Sequel sequencing [4, 5, 7] because the cost is lower and the quality of the reads is higher.  
345 However, both require access to expensive sequencers, the sequencing has to be outsourced,  
346 and the users usually have to wait for several weeks in order to obtain the data. This is not the  
347 case for barcoding with MinION where most of the data are collected within 10 hours of  
348 sequencing. Our proposed MinION pipeline has the additional advantage that it only requires  
349 basic molecular lab equipment including thermocyclers, magnetic rack, Qubit and potentially a  
350 server computer. The latter is only needed for base-calling and should be replaceable by a new  
351 portable, custom-built computational device for base-calling ONT data ("MinIT") while  
352 demultiplexing and barcode-calling only requires a regular laptop computer. Overall, these  
353 requirements are minimal which means that fully functional barcoding labs can be established for  
354 <USD 5,000. Arguably, the biggest operational issue may be access to a sufficiently large number

355 of thermocyclers given that a study of the scale described here involved amplifying PCR products  
356 in 92 microplates (=92 PCR runs).

357

358 Our new workflow for large-scale species discovery is based on sequencing the amplicons in two  
359 sequencing runs. The second sequencing run can re-use the flowcell that was used for the first  
360 run. Two runs are desirable because it improves overall barcoding success rates. The first run is  
361 used to identify those PCR products with “weak” signal (=low coverage). These weak products  
362 can then be re-sequenced in the second run. This dual-run strategy is designed to overcome the  
363 challenges related to sequencing large numbers of PCR products: the quality and quantity of DNA  
364 extracts are poorly controlled and PCR efficiency varies considerably. Pooling of products ideally  
365 requires normalization, but this is not practical when thousands of samples are handled. Instead,  
366 one can use the real-time sequencing provided by MinION to determine coverage and then boost  
367 the coverage of low-coverage products by preparing and re-sequencing a separate library that  
368 contains only the low coverage samples. Given that library preparations only require <200 ng of  
369 DNA, even a set of weak amplicons will yield a sufficient amount of DNA.

370

371 *MinION sequencing and the “reverse workflow”*

372

373 Based on our data, we would argue that MinION is now suitable for implementing the “reverse-  
374 workflow” where all specimens are sequenced first before mOTUs are assessed for morphological  
375 consistency. This differs from the traditional workflow in that the latter requires sorting based on  
376 morphology with only some morpho-species being subsequently tested via limited barcoding. We  
377 would argue that the reverse-workflow is more suitable for handling species- and specimen-rich  
378 clades because it requires less time than high-quality sorting based on morphology which often  
379 involves genitalia preparations and slide-mounts. We would argue that expert sorting and



380 identification of material based on morphology is only very efficient for taxa where species-specific  
381 morphological characters are easily accessible and the number of specimens is small. However,  
382 most undiscovered and undescribed species are in poorly explored groups and regions where  
383 specimen sorting and identification using the traditional techniques will be much slower. For  
384 example, even if we assume that an expert can sort and identify 50 specimens of unknown phorids  
385 per day, the reverse workflow pipeline would increase the species-level sorting rate by >10 times  
386 (based on the extraction and PCR of six microplates per day). In addition, the sorting would be  
387 carried out by lab personnel trained in amplicon sequencing while accurate morpho-species  
388 sorting requires highly specialized taxonomic experts. Even such highly trained taxonomic experts  
389 are often not able to match males and females of the same species (often one sex is ignored in  
390 morphological sorting) while the matching of sexes and immatures is an automatic and desirable  
391 byproduct of applying the reverse workflow [6].

392  
393 One key element of the reverse workflow is that vials with specimens that have haplotype  
394 distances <5% are physically kept together. This helps when taxonomic experts scrutinize  
395 mOTUs for congruence with morpho-species. Indeed, graphical representation of haplotype  
396 relationships (e.g., haplotype networks) can be used to guide morphological re-examination as  
397 illustrated in our description of *Megaselia sepsoides* (Fig. 7). The eight specimens belonged to  
398 seven haplotypes, the most distant haplotypes were dissected in order to test whether the data  
399 are consistent with one or two species. Variations in setation were observed (Fig. 6) that were  
400 deemed likely to be consistent with intraspecific variation. Note that the morphological  
401 examination of clusters is straightforward because the use of QuickExtract for DNA extractions  
402 ensures morphologically intact specimens. We predict that taxa that have been historically  
403 ignored or understudied due to extreme abundance of common species and high species diversity  
404 will now become more accessible because taxonomic experts can work on pre-sorted material  
405 instead of thousands of unsorted specimens.

406

407 But how good is the correspondence between mOTUs and morpho-species. We checked 100  
408 randomly chosen mOTUs for congruence with morphospecies. We find that 93% of clusters are  
409 congruent, and over 99% of specimens (six of the seven cases of incongruence were single  
410 specimens). This is in line with congruence levels that we observed for ants and odonates [4, 6].  
411 This means that MinION barcodes are not only reliable but also yield mOTUs that are largely  
412 congruent with morphospecies. This also means they are suitable for characterizing even  
413 complex and species-rich samples of hyper-diverse invertebrate clades.

414

415 *Remarkably high diversity of Phoridae in Kibale National Park*

416 It is astonishing that the barcodes obtained from a single site in Kibale National Park (Uganda)  
417 revealed ca. 650 mOTUs of phorid flies. This diversity, obtained from one Malaise trap, contains  
418 150% of the number of described phorid species (466) known from the entire Afrotropical region;  
419 i.e., numerically at least 184 species must be new to the region or to science [14]. Note that the  
420 barcoded specimens only represent 8 one-week samples between March 2010 and February  
421 2011; i.e., forty-four samples obtained from the same Malaise trap remain un-sequenced. We  
422 thus expect the diversity from this single site to eventually well exceed 1000 species (Fig. 4).

423

424 The unexpectedly high species richness found in this study inspired us to muse about the species  
425 diversity of phorids in the Afrotropical region. This is what Terry Erwin did when he famously  
426 estimated a tropical arthropod fauna of 30 million species based on his explorations of beetle  
427 diversity in Panama [30]. Such speculation is useful because raises new questions, inspires  
428 follow-up research, and may be needed given that even with extensive sampling, the species  
429 richness of diverse taxa can be remarkably difficult to estimate [31]. The Afrotropical region  
430 comprises roughly 2000 squares of 100 km<sup>2</sup> size. In our study we only sampled a tiny area within

431 one of these squares and observed 650 species which are likely to represent a species  
432 assemblage that exceeds >1000 species. This will only be a subset of the phorid fauna in the  
433 area because many specialist species (e.g., termite inquiline) are not collected in Malaise traps.  
434 Of course, the 1000 species are also only a subset of the species occurring in the remaining  
435 habitats in the same 100 km<sup>2</sup> square which is likely to be home to several thousand species of  
436 phorids. But let's only assume that on average each of the two-thousand 100 km<sup>2</sup> squares have  
437 100 endemic phorid species. If so, the "endemic" phorids alone would contribute 200,000 species  
438 of phorids to the Afrotropical fauna without even considering the contributions to species diversity  
439 by the "normal" species turnover of the remaining species. These considerations make us believe  
440 that it would be somewhat surprising if the Afrotropical region were to have fewer than half a  
441 million species of phorids! Based on our sample from Kibale National Park, 90% of species and  
442 specimens would belong to *Megaselia* as currently circumscribed. Could it be that there are  
443 450,000 species of Afrotropical *Megaselia*? These guesstimates would only be much lower if the  
444 vast majority of phorid species had very wide distributions which we consider somewhat unlikely  
445 given that the Afrotropical region covers a wide variety of climates and habitats.

446

447 As documented by our study, the bulk of phorid species are *Megaselia*. Based on the traditional  
448 workflow, almost all these specimens would be relegated to unsorted Malaise trap residues for  
449 decades or centuries. Indeed, there are thousands of vials labeled as "Phoridae" decorating the  
450 shelves of all major museums worldwide. The traditional workflow is not able to keep pace with  
451 the species numbers and abundance. This makes rapid species-level sorting with "NGS  
452 barcodes" [4] so important. Biologists will finally be able to work on taxa that are so specimen-  
453 and species-rich that they were considered unworkable with the traditional techniques. MinION  
454 barcodes will be one of the techniques that can be used to tackle these clades. We predict that  
455 these barcodes will become particularly important for setting up mobile laboratories that can

456 operate under field conditions, but MinION barcodes can also be generated by highschool  
457 students and citizen scientists.

458

## 459 **METHODS**

### 460 **1. Sampling**

461 Samples were collected from a single Townes-type Malaise trap [32], in the Kibale National Park,  
462 close to Kanyawara Biological Station in the evergreen primeval forest at an altitude of 1513 m  
463 (00°33'54.2"N 30°21'31.3"E) (Fig. 4). Kibale National Park is characterized as a fragment of  
464 submontane equatorial woodland being home to 216 tree species [33]. Temperatures in Kibale  
465 range from 16°C to 23°C (annual mean daily minimum and maximum, respectively) [34]. As  
466 described, the Malaise trap was checked every week when the collecting bottle with the material  
467 was replaced by a resident parataxonomist ([35]: Mr. Swaibu Katusabe). The material was  
468 thereafter sorted to higher-level taxa. Target Diptera taxa were sorted to family and we here used  
469 Phoridae. The sampling was done over several months between 2010 and 2011. For the study  
470 carried out here, we only barcoded ca. 30% of the phorid specimens. The flies were stored in  
471 ethyl alcohol at -20–25°C until extraction.

### 472 **2. DNA extraction**

473 DNA was extracted using 10 ul of QuickExtract in a 96 well plate format and the whole fly was  
474 used to extract DNA. The solution with the fly was incubated at 65°C for 15 min followed by 98°C  
475 for 2 min. No homogenization was carried to ensure that intact specimen was available for  
476 morphological examination.

477

### 478 **3. MinION based DNA barcoding**

479

480 *I. Polymerase Chain Reactions (PCRs)*

481 Each plate with 96 QuickExtract extracts (95 specimens and 1 control, with exception of one plate  
482 with no negative and one partial plate) was subjected to PCR in order to amplify the 658 bp  
483 fragment of COI using LCO1490 5' GGTCACAATCATAAAGATATTGG 3' and HCO2198 5'  
484 TAAACTTCAGGGTGACCAAAAATCA 3'. Each PCR product was amplified using primers that  
485 included a 13 bp tag. For this study, 96 thirteen-bp tags were newly generated in order to allow  
486 for upscaling of barcoding; these tags allow for multiplexing >9200 products in a single flowcell of  
487 MinION through unique tag combinations (96x96 combinations). To obtain these 96 tags, we first  
488 generated one thousand tags that differed by at least 6 bp using with BarcodeGenerator  
489 ([http://comailab.genomecenter.ucdavis.edu/index.php/Barcode\\_generator](http://comailab.genomecenter.ucdavis.edu/index.php/Barcode_generator)) [36] However, tag  
490 distances of >6 bp are not sufficient because they do not take into account MinION's propensity  
491 for generating homopolymer and other indel errors. We thus excluded tags with homopolymeric  
492 stretches that were >2 bp long. We next used a custom script that identified tags that differed from  
493 each other by indel errors and eliminated tags recursively to ensure that the final sets of tags  
494 differed from each other by >=3bp errors of any type (any combination of  
495 insertions/deletions/substitutions). This corresponded with our bioinformatic strategy of using  
496 <=2bp mismatch in tag identification. Lastly, we excluded tags that ended with "GG" because  
497 LCO1490 starts with this motif. The PCR conditions were as follows, reaction mix: 10 µl Mastermix  
498 from CWBio, 0.16 µl of 25mM MgCl<sub>2</sub>, 2 µl of 1 mg/ml BSA, 1 µl each of 10 µM primers, and 1ul of  
499 DNA. The PCR conditions were 5 min initial denaturation at 94°C followed by 35 cycles of  
500 denaturation at 94°C (30sec), 45°C (1 min), 72°C (1 min), followed by final extension of 72°C  
501 (5min). For each plate, a subset of 7-12 products were run on a 2% agarose gel to ensure that  
502 PCRs were successful. Of the 96 plates studied, 4 plates were excluded from further analyses as  
503 they had <50% amplification success and one plate was duplicated across the two runs by  
504 accident.

505

506 *II. MinION sequencing*

507 The most cost-effective strategy for nanopore sequencing was optimized during the study. For  
508 the initial experiment (set 1) we sequenced amplicons for 4275 phorid flies. The flowcell was used  
509 for 48 hours and yielded barcodes for ~3200 products, but we noticed lack of data for products  
510 for which amplification bands could be observed on the agarose gel. We thus re-pooled all  
511 products with a sequencing depth <50X (2119 specimens), prepared a new library and sequenced  
512 them on a new flowcell. The experiment was successful. However, in order reduce sequencing  
513 cost, we pursued a different strategy for the second set of specimens. This set consisted of pooled  
514 amplicons for 4519 flies, but here we stopped the sequencing on the flowcell after 24 hours. The  
515 flowcell was then washed using ONT's flowcell wash kit and prepared for reuse. The results from  
516 the first 24 hours of sequencing were used to identify amplicons with weak coverage. They were  
517 re-pooled, a second library was prepared, and sequenced on the pre-used and washed flowcell.

518  
519 Amplicon pooling strategy: For set 1, all plates were grouped by amplicon strength as judged by  
520 the intensity of products on agarose gels (5 strong pools +2 weak pools). For set 2, each plate  
521 was pooled, quantified, and cleaned using either 1X Ampure beads or 1.1X Sera-Mag beads in  
522 PEG. For the re-sequencing of weak or "problematic" products (see below), we identified the latter  
523 based on the results of the initial sequencing run. We located (1) specimens  $\leq 10X$  coverage (set  
524 1: 1054, set 2: 1054) and (2) samples with coverage between 10X and 50X (set 1: 1118, set 2:  
525 1065). Lastly, we also created a (3) third pool of specimens with problematic products that were  
526 defined as those that were found to be of low accuracy during comparisons with Illumina barcodes  
527 and those that had high levels of ambiguous bases (>1% ambiguous bases during preliminary  
528 barcode calling). Very few amplicons belonged to this category (set 1: 68, set 2: 92) and it is thus  
529 not included in the flowchart in Figure 1. In order to efficiently re-pool hundreds of specimens  
530 across plates we wrote a script that generates visual maps of the all microplates that illustrate  
531 where the weak products are found.

532

533 Library preparation and sequencing: We used the SQK-LSK109 ligation sequencing kit for library  
534 preparation and sequencing. Our first experiment on set 1 used 1 ug of starting DNA while all  
535 other libraries used 200 ng pooled product. Library preparation was carried out as per  
536 manufacturer's instructions with one exception: the various clean-up procedures at the end-prep  
537 and ligation stages used 1X Ampure beads instead of 0.4 X as suggested in the instructions  
538 because the amplicons in our experiments were short (~735 bp with primers and tags). The  
539 sequencing was carried out using MinION sequencer with varying MinKNOW versions between  
540 August 2018 - January 2019. Fast5 files generated were uploaded onto a computer server and  
541 base-calling was carried out using Guppy 2.3.5+53a111f. No quality filtering criteria were used.  
542 Our initial work with Albacore suggested that quality filtering improved demultiplexing rate but  
543 overall more reads could be demultiplexed without the filtering criterion.

544

### 545 *III. Data analyses for MinION barcoding*

546 We analysed the data using miniBarcoder [13], which was improved in several ways for the  
547 present study. Overall, the pipeline starts with a primer search with *glsearch36*, then flanking  
548 nucleotide sequences are identified, and reads are demultiplexed based on tags. For the latter,  
549 an error of up to 2 bp errors are allowed. The demultiplexed reads are aligned using MAFFT v7  
550 (--op 0) (here v7) [37]. In order to improve speed, we used only a random subset of 100 reads  
551 from each demultiplexed file for alignment. Based on these alignments, a majority rule consensus  
552 is called to obtain what we call "MAFFT barcodes". A second preliminary barcode is generated  
553 by mapping all reads back to the MAFFT barcode using Graphmap (here v0.5.2) [38] and calling  
554 the consensus using Racon (here, v1.3.1) [39]. This yields what we call "RACON barcodes". Both  
555 MAFFT and RACON barcodes are subject to further correction based on publicly available  
556 barcodes in GenBank. These corrections are advisable in order to fix remaining indel errors. The  
557 correction takes advantage of the fact that COI sequences are translatable; i.e., an amino-acid

558 based error correction pipeline can be used (details can be found in Srivathsan et al. (2018).  
559 Applying this pipeline to MAFFT and RACON barcodes respectively yields MAFFT+AA and  
560 RACON+AA barcodes. Lastly, these barcodes can be consolidated by comparing them to yield  
561 “consolidated barcodes”.

562

563 The version of the pipeline in Srivathsan et al. [13] was modified as follows:

564

565 a. *Tackling 1D reads for massively multiplexed data*: The large number of simultaneously  
566 barcoded specimens presented many challenges related to varying coverage and quality. We  
567 hence sought to develop ways to account for increased error rates of 1D sequencing and develop  
568 objective ways for quality assessments based on the MinION data and publically available data  
569 (GenBank): (1) The GraphMap max error was increased from 0.05 to 0.15 to account for error  
570 rates of 1D reads. (2) We modified the approach for calculating consolidated barcodes. We here  
571 use the strict consensus of MAFFT+AA and RACON+AA barcodes in order to resolve conflicts  
572 between MAFFT and RACON barcodes if there are substitution conflicts. In Srivathsan et al.  
573 (2018) we accepted MAFFT+AA barcodes in cases of conflict, but for the 1D data we found that  
574 MAFFT+AA barcodes had more ambiguities than RACON+AA barcodes which could be resolved  
575 via calculating a strict consensus. We also introduced a criterion for identifying “problematic”  
576 barcodes based on observing too many differences between MAFFT+AA and RACON+AA  
577 barcodes; i.e., if indels are found in the alignment of MAFFT+AA and RACON+AA barcode during  
578 consolidation, the barcode is rejected. This criterion is based on the fact that +AA barcodes should  
579 be indel-free. Either the MAFFT+AA or the RACON+AA barcode is likely to be incorrect, but there  
580 is no objective way to identify the correct sequence. (3) We assessed how different window sizes  
581 can impact the amino-acid correction pipeline by varying the “namino” parameter (number of AA  
582 to be inspected in each side of an indel).

583



584 *b. Demultiplexing rate:* (1) We introduced a “homopolymer compression” of the putative tag  
585 sequences in order to improve demultiplexing rates. After primer searches, the old pipeline used  
586 to identify the flanking 13 bps that were likely to be tag sequence. Instead we now use a 20 bp  
587 flanking sequence and then compress any homopolymer >3bp before searching for 13 bp tags.  
588 (2) We now analyze reads that are likely the result of two products that ligated during library  
589 preparation. This was based on our experience with one library where ligation of products was  
590 prominent (Supplementary Figure 1). Long reads are split into size classes of <1300, >1300 and  
591 <2000. These settings were set based on 658 bp barcode of COI: the total product size including  
592 tags and primers is 735 bp, and hence, a sequence with two products ligated to each other is  
593 expected to be 1470 bp long. The sequences were split in a manner that ensured that the tags of  
594 first product are not affecting the tag found in the second, i.e., primer search for second product  
595 was conducted after the first 650 bp of the sequence. Currently, this option is only available for  
596 reads that consist of two ligated products.

597  
598 *c. Processing speed and memory requirements:* (1) For primer identification we now limit the  
599 searches to the first and last 100 bp of each read which allowed for improving speed of the primer  
600 search. (2) We parallelized the process of demultiplexing and MAFFT barcode calling using  
601 multiprocessing in python. This allows for fast demultiplexing whenever computational power is  
602 limited. (3) We optimized the pipeline with regard to memory consumption and ensured that all  
603 processes are applied to batches of <=20000 sequences. The latter modification is needed given  
604 the rapid increase in MinION output and batch processing is scalable with increased output.

605

#### 606 **4. Illumina Based NGS Barcoding for validation**

607 In order to validate MinION barcodes and optimizing error correction strategies, we used  
608 reference COI barcodes obtained via Illumina sequencing for the same QuickExtract DNA  
609 extractions. Illumina sequencing was carried out for a 313 bp fragment of the same COI barcoding

610 region using m1COIintF: 5'-GGWACWGGWTGAACWGTWTAYCCYCC-3' [40] and modified  
611 jgHCO2198: 50-TANACYTCNGGRTGNCCRAARAA YCA-3 [41]. We recently conducted an  
612 extensive analyses to understand if a 313 bp minibarcode is able to provide similar identifications  
613 and species delimitations as the 658 bp barcodes and found this to be the case when examining  
614 >5000 species [42]. Tagged primers were used for the PCRs as specified in Wang et al. (2018)  
615 [43]. The PCR mix was as follows: 4 µl Mastermix from CWBio, 1µl of 1 mg/ml BSA, 1µl of 10 µM  
616 of each primer, and 1ul of DNA. PCR conditions: 5 min initial denaturation at 94°C followed by 35  
617 cycles of denaturation at 94°C (1 min), 47°C (2 min), 72°C (1 min), followed by final extension of  
618 72°C (5 min). The PCR products were pooled and sequenced along with thousands of other  
619 specimens in a lane of HiSeq 2500 (250 bp PE sequencing). The data processing followed Wang  
620 et al. (2018): paired end reads were merged using PEAR (v 0.9.6) [44], reads were demultiplexed  
621 by an inhouse pipeline that looks for perfect tags while allowing for 2 bp mismatches in primer  
622 sequence. For each sample, demultiplexed reads are merged to identify the most dominant  
623 sequence, and a barcode is accepted only if this sequence is 5X as common as the next most  
624 common sequence.

## 625 **5. Assessment of MinION barcodes and mOTU delimitations**

626 Both MinION and Illumina barcodes were subject to contamination check. For MinION barcodes  
627 we used preliminary MAFFT barcodes given that this is the largest barcode set. Barcodes were  
628 matched to GenBank using BLASTN and taxonomic classifications were assigned using  
629 readsidentifier [45]. Any barcode with >95% match to a non-phorid sequence was excluded from  
630 the dataset. Furthermore, if any barcode best matched to Bacteria, it was also excluded.

631

632 MinION barcodes were assessed by scripts provided in the miniBarcoder package  
633 (assess\_corrected\_barcodes.py and assess\_uncorrected\_barcodes.py). For uncorrected  
634 barcodes, this was done by aligning barcodes to reference Illumina barcodes using dnadiff [46].

635 For corrected barcodes (+AA), we used MAFFT to obtain pairwise alignments. This allowed us to  
636 compare per base accuracy. Here we excluded those barcodes that had >3% difference between  
637 MinION and Illumina barcodes. These are likely due to wet lab errors (<0.5% of specimens). Such  
638 error is not entirely surprising given that the MinION and Illumina barcodes were generated using  
639 different amplicons.

640 We were further interested in understanding how mOTU delimitation is affected by error  
641 correction. Barcodes were aligned using MAFFT and MinION barcodes were further trimmed to  
642 the 313 bp region of the Illumina barcode. mOTU delimitation was done at 2, 3, and 4% using  
643 SpeciesIdentifier (objective clustering) [47]. mOTU richness was estimated and we furthermore  
644 calculated match ratio between two sets of clusters [48]. Match ratio is given by  $\frac{2N_{match}}{N_1 + N_2}$ .

## 645 **6. Morphological examination**

646 For morphological examination of the clustered specimens we used 100 randomly selected non-  
647 singleton mOTUs delimited at 5% but also kept track of sub-clusters within the large mOTUs that  
648 were splitting at 1-5%. This allowed for examination of closely related, but potentially distinct,  
649 species. We were mostly interested in understanding if MinION barcodes were placing specimens  
650 into mOTUs incorrectly and hence we examined if specimens were consistent morphologically in  
651 each of these 5% clusters. The choice of 5% cluster may seem initially inconsistent with the choice  
652 of 3% for mOTU delimitation for other analyses, but examination of all specimens within 5%  
653 clusters allows for comparing multiple closely related 3% (or 1-5%) mOTUs. This often requires  
654 genitalia preparations which will be carried out at a larger scale once more specimens have been  
655 sequenced. In this study, the process is only illustrated for the newly described species for which  
656 we illustrate how the haplotype network obtained with the median joining method in PopART (Fig.  
657 7) [49] guides morphological examination of specimens for the new species, *Megaselia*  
658 *sepsioides* sp. nov.. Specimens with conspicuously large haplotype differences were dissected in

659 order to rule out the presence of multiple closely related species. Differences in setation were  
660 observed between the two distant haplotypes (UGC0012899 and UGC001224) and the main  
661 cluster (UGC0003003, UGC0005864, UGC0005996, UGC0006224, UGC0012568,  
662 UGC0012937, and UGC0012971) and are detailed in Fig. 6. It is deemed likely that with further  
663 collection of specimens from this haplotype cluster, these now rather distinct differences will be  
664 absorbed into a continuum of intraspecific variation. Specimen examination was done with a Leica  
665 m80 and Leica M205 C stereo microscopes and the images were obtained with a Dun Inc.  
666 Microscope Macrophotography system (Canon 7D chassis with 10X Mitutoyo lens). Photography  
667 stacking was done with Zerene stacker. Specimens were cleared with clove oil and mounted on  
668 slides in Canada balsam following the protocol of Disney [50].

## 669 **7. Species Richness estimation**

670 The most accurate set of barcodes were used for assessing the overall diversity of the barcoded  
671 phorids. mOTU delimitation was based on SpeciesIdentifier [47]. The 3% mOTUs were used for  
672 estimating species richness. Here we used EstimateS9 [51], and changed the diversity settings  
673 to use the classical formula of Chao1 and Chao2. This is because coefficient of variation of the  
674 abundance or incidence distribution was  $>0.5$ .

675

## 676 **AVAILABILITY OF SOURCE CODE AND REQUIREMENTS**

- 677 • Project name: miniBarcoder
- 678 • Project home page: <https://github.com/asrivathsan/miniBarcoder>
- 679 • Operating system(s): Linux, MacOSX (for initial barcode calling)
- 680 • Programming language: Python
- 681 • Other requirements: MAFFT BARCODE: MAFFT, glsearch36, RACON BARCODE:  
682 GraphMap, Racon, and amino acid correction: BioPython, MAFFT

- 683 • License: GNU GPL
- 684 • New scripts included: mb\_parallel\_consensus.py mb\_parallel\_demultiplex.py,
- 685 repool\_by\_plate.py
- 686 • Updated scripts: consolidate.py, bug fix in aacorreption.py

## 687 **AVAILABILITY OF SUPPORTING DATA AND MATERIALS**

688 Besides the source code, the nanopore data and input files and barcode sets will be made  
689 available once FTP link is obtained.

## 690 **DECLARATIONS**

691 **Competing Interests:** The author(s) declare(s) that they have no competing interests.

692 **Funding:** We would like to acknowledge support from the following grants: MOE grant for  
693 biodiversity discovery (R-154-000-A22-112), NUS SEABIG grant (R-154-000-648-646 and R-  
694 154-000-648-733), and institutional research funding (IUT21-1) of the Estonian Ministry of  
695 Education and Research for O.K..

696 **Author's Contributions:** R.M. and A.S. conceived the workflow and the analytical approach.  
697 O.K. conducted/organized the sampling and Diptera sorting and commented on the manuscript.  
698 Molecular work was conducted by J.P., W.T.L., S.N.K., E.H. and A.S. Pipeline development and  
699 data analyses was conducted by A.S. Morphological examination, and species description was  
700 conducted by E.H. Figures were prepared by E.H., S.N.K., A.S. Manuscript was written by R.M.,  
701 A.S. and E.H..

702 **Acknowledgements:** Yuchen Ang is thanked for his help photographing the new species and for  
703 his suggestion of sepsioides as the specific epithet. Henry Disney and Brian Brown are thanked  
704 for their consultation on the new species of *Megaselia*. We thank Arina Adom for help in curating  
705 the Illumina barcodes.

706

707 **REFERENCES**

- 708 1. Wilson EO. Biodiversity research requires more boots on the ground. *Nat Ecol Evol.* 2017;1  
709 11:1590-1. doi:10.1038/s41559-017-0360-y.
- 710 2. Krell F-T. Parataxonomy vs. taxonomy in biodiversity studies – pitfalls and applicability of  
711 ‘morphospecies’ sorting. *Biodiversity and Conservation.* 2004;13 4:795-812.  
712 doi:10.1023/b:Bioc.0000011727.53780.63.
- 713 3. Hebert PD, Cywinska A, Ball SL and deWaard JR. Biological identifications through DNA barcodes.  
714 *Proceedings of Royal Society B.* 2003;270 1512:313-21.
- 715 4. Wang WY, Srivathsan A, Foo M, Yamane SK and Meier R. Sorting specimen-rich invertebrate  
716 samples with cost-effective NGS barcodes: Validating a reverse workflow for specimen  
717 processing. *Molecular Ecology Resources.* 2018;18 3:490-501.
- 718 5. Meier R, Wong W, Srivathsan A and Foo M. \$1 DNA barcodes for reconstructing complex  
719 phenomes and finding rare species in specimen-rich samples. *Cladistics.* 2016;32 1:100-10.
- 720 6. Yeo D, Puniamoorthy J, Ngiam RWJ and Meier R. Towards holomorphology in entomology: rapid  
721 and cost-effective adult–larva matching using NGS barcodes. *Systematic Entomology.* 2018;43  
722 4:678-91.
- 723 7. Hebert PDN, Braukmann TWA, Prosser SWJ, Ratnasingham S, deWaard JR, Ivanova NV, et al. A  
724 Sequel to Sanger: amplicon sequencing that scales. *BMC Genomics.* 2018;19:219.
- 725 8. Shokralla S, Porter TM, Gibson JF, Dobosz R, Janzen DH, Hallwachs W, et al. Massively parallel  
726 multiplex DNA sequencing for specimen identification using an Illumina MiSeq platform.  
727 *Scientific Reports.* 2015;5:9687.
- 728 9. Creedy TJ, Norman H, Tang CQ, Chim KQ, Andujar C, Arribas P, et al. A validated workflow for  
729 rapid taxonomic assignment and monitoring of a national fauna of bees (Apiformes) using high  
730 throughput barcoding. *BioRxiv.* 2019; doi:10.1101/575308.
- 731 10. Krehenwinkel H, Kennedy SR, Rueda A, Lam A and Gillespie RG. Scaling up DNA barcoding –  
732 Primer sets for simple and cost efficient arthropod systematics by multiplex PCR and Illumina  
733 amplicon sequencing. 9. 2018;11 2181-2193.
- 734 11. Krehenwinkel H, Pomerantz A, Henderson JB, Kennedy SR, Lim JY, Swamy V, et al. Nanopore  
735 sequencing of long ribosomal DNA amplicons enables portable and simple biodiversity  
736 assessments with high phylogenetic resolution across broad taxonomic scale. *GigaScience.* 2019;  
737 doi:10.1093/gigascience/giz006.
- 738 12. Krehenwinkel H, Wolf M, Lim JY, Rominger AJ, Simison WB and Gillespie RG. Estimating and  
739 mitigating amplification bias in qualitative and quantitative arthropod metabarcoding. *Scientific  
740 Reports.* 2017;7 17668.
- 741 13. Srivathsan A, Baloglu B, Wang W, Tan WX, Bertrand D, Ng AHQ, et al. A MinION™-based pipeline  
742 for fast and cost-effective DNA barcoding. *Molecular Ecology Resources.* 2018;18 5:1035-49.
- 743 14. Brown BV: Phorid Catalog. <http://phorid.net/pcat/>. Accessed 27 April 2019.
- 744 15. Stork NE. How Many Species of Insects and Other Terrestrial Arthropods Are There on Earth?  
745 *Annu Rev Entomol.* 2018;63:31-45. doi:10.1146/annurev-ento-020117-043348.
- 746 16. Zhang ZQ. Animal biodiversity: An introduction to higher-level classification and taxonomic  
747 richness. Magnolia Press; 2011.
- 748 17. Forbes AA, Bagley RK, Beer MA, Hippee AC and Widmayer HA. Quantifying the unquantifiable:  
749 why Hymenoptera – not Coleoptera – is the most speciose animal order. *BMC Ecology.* 2018;18  
750 21 doi:10.1101/274431.

- 751 18. Hebert PD, Ratnasingham S, Zakharov EV, Telfer AC, Levesque-Beaudin V, Milton MA, et al.  
752 Counting animal species with DNA barcodes: Canadian insects. *Philos Trans R Soc Lond B Biol Sci.*  
753 2016;371 1702 doi:10.1098/rstb.2015.0333.
- 754 19. Borkent ART, Brown BV, Adler PH, Amorim DDS, Barber K, Bickel D, et al. Remarkable fly  
755 (Diptera) diversity in a patch of Costa Rican cloud forest: Why inventory is a vital science.  
756 *Zootaxa.* 2018;4402 1 doi:10.11646/zootaxa.4402.1.3.
- 757 20. Brown BV, Borkent A, Adler PH, De Souza Amorim D, Barber K, Bickel D, et al. Comprehensive  
758 inventory of true flies (Diptera) at a tropical site. *Communications Biology.* 2018;1 21:8.  
759 doi:10.1038/s42003-018-0022-x.
- 760 21. Marshall SA. *Flies: The Natural History and Diversity of Diptera.* Buffalo, New York: Firefly Books;  
761 2012.
- 762 22. Brown BV and Hartop EA. Big data from tiny flies: patterns revealed from over 42,000 phorid  
763 flies (Insecta: Diptera: Phoridae) collected over one year in Los Angeles, California, USA. *Urban*  
764 *Ecosystems.* 2016; doi:10.1007/s11252-016-0612-7.
- 765 23. Vaser R, Sovic I, Nagarajan N and Sikic M. Fast and accurate de novo genome assembly from  
766 long uncorrected reads. *Genome Res.* 2017;27 5:737-46. doi:10.1101/gr.214270.116.
- 767 24. Kwong S, Srivathsan A, Vaidya G and Meier R. Is the COI barcoding gene involved in speciation  
768 through intergenomic conflict?. *Molecular Phylogenetics and Evolution.* 2012;62 3:1009.
- 769 25. Hartop EA and Brown BV. The tip of the iceberg: a distinctive new spotted-wing *Megaselia*  
770 species (Diptera: Phoridae) from a tropical cloud forest survey and a new, streamlined method  
771 for *Megaselia* descriptions. *Biodiversity Data Journal.* 2014;2:e4093. doi:doi:  
772 10.3897/BDJ.2.e4093.
- 773 26. Hartop EA, Brown BV and Disney RHL. Opportunity in our ignorance: urban biodiversity study  
774 reveals 30 new species and one new Nearctic record for *Megaselia* (Diptera: Phoridae) in Los  
775 Angeles (California, USA). *Zootaxa.* 2015;3941:451-84.
- 776 27. Hartop EA, Brown BV and Disney RHL. Flies from L.A., The Sequel: Twelve further new species of  
777 *Megaselia* (Diptera: Phoridae) from the BioSCAN Project in Los Angeles (California, USA).  
778 *Biodiversity Data Journal.* 2016, p. e7756.
- 779 28. Riedel A, Sagata K, Surbakti S, Rene T and Michael B. One hundred and one new species of  
780 *Trigonopterus* weevils from New Guinea. *Zookeys.* 2013; 280:1-150.  
781 doi:10.3897/zookeys.280.3906.
- 782 29. ONT: <https://store.nanoporetech.com/kits-250/1d-sequencing-kit.html>. Accessed 28 April 2019.
- 783 30. Erwin TL. Tropical Forests: Their Richness in Coleoptera and Other Arthropod Species. *The*  
784 *Coleopterists Bulletin.* 1982;36 1:74-5.
- 785 31. Longino JT, Coddington J and Colwell RK. The ant fauna of a tropical rain forest: estimating  
786 species richness three different ways. *Ecology.* 2002;83:689-702.
- 787 32. Townes H. A light-weight Malaise trap. *Entomological News.* 1972;83:239-47.
- 788 33. Howard PC. Nature conservation in Uganda's tropical forest reserves. *The IUCN Tropical Forest*  
789 *Programme.* 1991.
- 790 34. Chapman CA and Chapman LJ. Forest regeneration in logged and unlogged forests of Kibale  
791 National Park, Uganda. *Biotropica.* 1997;29:396-412.
- 792 35. Kurina O. Description of four new species of *Zygomylia* Winnertz from Ethiopia and Uganda  
793 (Diptera: Mycetophilidae). *African Invertebrates.* 2012;53 1:205-20.
- 794 36. Comai L and Howell T. Barcode Generator.  
795 [http://comailabgenomecenter.ucdavis.edu/index.php/Barcode\\_generator](http://comailabgenomecenter.ucdavis.edu/index.php/Barcode_generator). 2012.
- 796 37. Katoh K and Standley DM. MAFFT multiple sequence alignment software version 7:  
797 improvements in performance and usability. *Molecular Biology and Evolution.* 2013;30 4:772-  
798 80.



- 799 38. Sovic I, Sikic M, Wilm A, Fenlon SN, Chen S and Nagarajan N. Fast and sensitive mapping of  
800 nanopore sequencing reads with GraphMap. *Nature Communications*. 2016;7:11307.
- 801 39. Vaser R, Sovic I, Nagarajan N and Sikic M. Fast and accurate de novo genome assembly from  
802 long uncorrected reads. *Genome Research*. 2017;27 5:737-46.
- 803 40. Leray M, Yang JY, Meyer CP, Mills SC, Agudelo N, Ranwez V, et al. A new versatile primer set  
804 targeting a short fragment of the mitochondrial COI region for metabarcoding metazoan  
805 diversity: application for characterizing coral reef fish gut contents. *Frontiers in Zoology*.  
806 2013;10:34.
- 807 41. Geller JM, C., Parker M and Hawk H. Redesign of PCR primers for mitochondrial cytochrome c  
808 oxidase subunit I for marine invertebrates and application in all-taxa biotic surveys. *Molecular  
809 Ecology Resources*. 2013;13 5:851-61.
- 810 42. Yeo D, Srivathsan A and Meier R. Mini-barcodes are more suitable for large-scale species  
811 discovery in Metazoa than full-length barcodes. *bioRxiv*. 2019
- 812 43. Wang WY, Srivathsan A, Foo M, Yamane SK and Meier R. Sorting specimen-rich invertebrate  
813 samples with cost-effective NGS barcodes: Validating a reverse workflow for specimen  
814 processing. *Molecular ecology resources*. 2018;18 3:490-501. doi:10.1111/1755-0998.12751.
- 815 44. Zhang J, Kobert K, Flouri T and Stamatakis A. PEAR: a fast and accurate Illumina Paired-End reAd  
816 mergeR. *Bioinformatics*. 2014;30 5:614-20.
- 817 45. Srivathsan A, Sha JC, Vogler AP and Meier R. Comparing the effectiveness of metagenomics and  
818 metabarcoding for diet analysis of a leaf-feeding monkey (*Pygathrix nemaeus*). *Mol Ecol Resour*.  
819 2015;15 2:250-61. doi:10.1111/1755-0998.12302.
- 820 46. Kurtz S, Phillippy A, Delcher AL, Smoot M, Shumway M, Antonescu C, et al. Versatile and open  
821 software for comparing large genomes. *Genome biology*. 2004;5 2:R12. doi:10.1186/gb-2004-5-  
822 2-r12.
- 823 47. Meier R, Shiyang K, Vaidya G and Ng PKL. DNA Barcoding and Taxonomy in Diptera: A Tale of  
824 High Intraspecific Variability and Low Identification Success. *Systematic Biology*. 2006;55 5:715-  
825 28.
- 826 48. Ahrens D, Fujisawa T, Krammer HJ, Eberle J, Fabrizi S and Vogler AP. Rarity and Incomplete  
827 Sampling in DNA-based Species Delimitatio. *Systematic Biology*. 2016;65 3:478-94.
- 828 49. Leigh JW and Bryant D. PopART: Full-feature software for haplotype network construction.  
829 *Methods Ecol Evol*. 2015;6 9:1110-6.
- 830 50. Disney RHL. Scuttle flies (Diptera: Phoridae) Part II: the genus *Megaselia*. *Fauna of Arabia*.  
831 2009;24:249-357.
- 832 51. Colwell RK. EstimateS: Statistical estimation of species richness and shared species from  
833 samples. Version 9 and earlier. User's Guide and application. 2013.

834

835



836 **Figure Legends**

837 Figure 1. Flowchart for generating MinION barcodes.

838 Figure 2: Effect of re-pooling on coverage of barcodes for both sets of specimens.

839 Figure 3: Ambiguities in MAFFT+AA (Blue), RACON+AA (Orange) and Consolidated barcodes

840 (green) with varying namino parameters (1,2 and 3). One outlier value for Racon+3AA barcode

841 corresponding to 13% ambiguities was excluded from the plot.

842 Figure 4: The Malaise trap that revealed the estimated >1000 mOTUs as shown by the species

843 richness estimation curve. Yellow: Chao1 Mean, Blue: S (Mean), Orange: Singleton

844 Mean, Grey: Doubleton mean.

845 Figure 5: Lateral habitus (a) and diagnostic features of *Megaselia sepsioides* spec. nov. (a,

846 inset) terminalia, (b) posterior view of foreleg, (c) anterior view of midleg (d,e) anterior and

847 postero-dorsal views of hindleg, (e) dorsal view of thorax and abdomen.

848

849 Figure 6. Haplotype variation of *Megaselia sepsioides* spec. nov. (a) UGC0005996, (b)

850 UGC0012244, (c) UGC0012899. UGC numbers refer to specimen IDs.

851

852 Figure 7. Haplotype network for *Megaselia sepsioides* spec. nov. UGC numbers refer to specimen

853 IDs.

Table 1: Number of reads and barcodes generated via MinION sequencing.

|                                                           | <b>Set 1: Two flowcells</b> | <b>Set 2: One flowcell</b> | <b>Combined (set 1 &amp; 2)*</b> |
|-----------------------------------------------------------|-----------------------------|----------------------------|----------------------------------|
| # Specimens                                               | 4275                        | 4519                       | 8699                             |
| Resequencing (re-pooled)                                  | 2172                        | 2211                       |                                  |
| # reads/# reads >600 bp                                   | 7,035,075/3,703,712         | 7,179,121/2,652,657        |                                  |
| Initial sequencing (all)                                  | 3,069,048/1,942,212         | 4,853,363/2,250,591        |                                  |
| Resequencing (re-pooled)                                  | 3,966,027/1,761,500         | 2,325,758/402,066          |                                  |
| # demultiplexed reads                                     | 898,979 (24.3%)             | 647,152 (24.4%)            | NA                               |
| Initial sequencing (all)                                  | 562,434 (29%)               | 561,383 (24.9%)            |                                  |
| Resequencing (re-pooled)                                  | 336,545 (19%)               | 85,769 (21.3%)             |                                  |
| <b>Combined results of original and resequencing runs</b> |                             |                            |                                  |
| # specimens with >=5X coverage                            | 4227 (98.9%)                | 4287 (94.9%)               | 8428 (96.9%)                     |
| # MAFFT barcodes <1% N's                                  | 3797 (88.8%)                | 3476 (76.9%)               | 7220 (83%)                       |
| # MAFFT + AA barcodes                                     | 3774 (88.3%)                | 3464 (75.7%)               | 7178 (82.5%)                     |
| # RACON barcodes                                          | 3797 (88.8%)                | 3476 (76.9%)               | 7220 (83%)                       |
| # RACON +AA barcodes                                      | 3790 (88.7%)                | 3469 (76.7%)               | 7194 (83%)                       |
| # Consolidated barcodes                                   | 3740 (87.4%)                | 3394 (75%)                 | 7115 (81.8%)                     |
| # Consolidated barcodes (non-phorids removed)             | 3700 (86.7%)                | 3369 (74.6%)               | 7062 (81.2%)                     |
| <b># mOTUS (2/3/4%)</b>                                   |                             |                            | <b>728/685/636</b>               |

\* one plate was accidentally sequenced in both runs, wherever duplicates were present, second run was selected.

Table 2. Accuracy of MinION as assessed by Illumina barcodes. The overall optimal strategy is “Consolidated (namino=2)”. Optimal congruence values are highlighted in green.

| Dataset                        | # compared with Illumina | Accuracy       | # barcodes with errors/# >3% errors | mOTU richness deviation between MinION and Illumina barcodes |                   |                   |
|--------------------------------|--------------------------|----------------|-------------------------------------|--------------------------------------------------------------|-------------------|-------------------|
|                                |                          |                |                                     | 2%                                                           | 3%                | 4%                |
| MAFFT                          | 6330                     | 99.6091        | 4473/31                             | -3 (-0.43%)                                                  | <b>-1 (-0.15)</b> | -8 (-1.3)         |
| RACON                          | 6330                     | 99.5075        | 4526/37                             | 15 (2.08%)                                                   | 5 (0.75)          | <b>-3 (-0.48)</b> |
| MAFFT + AA (namino=1)          | 6146                     | 99.9689        | 269/30                              | -6 (-0.85%)                                                  | -4 (-0.61)        | -15 (-2.7)        |
| MAFFT + AA (namino=2)          | 6146                     | 99.9795        | 218/28                              | -8 (-1.15%)                                                  | -6 (-0.91)        | -13 (-2.2)        |
| MAFFT + AA (namino=3)          | 6286                     | 99.967         | 350/28                              | -7 (-0.1%)                                                   | -4 (-0.61)        | -14 (-2.2)        |
| RACON+AA (namino=1)            | 6319                     | 99.9617        | 419/27                              | 5 (0.72%)                                                    | <b>1 (0.15)</b>   | <b>-3 (-0.48)</b> |
| RACON+AA (namino=2)            | 6319                     | 99.9711        | 326/27                              | 2 (0.29%)                                                    | -2 (-0.31)        | -5 (-0.81)        |
| RACON+AA (namino=3)            | 6319                     | 99.9664        | 383/29                              | 4 (0.57%)                                                    | -2 (-0.3)         | -8 (-1.28)        |
| Consolidated (namino=1)        | 6230                     | 99.9855        | 191/ <b>25</b>                      | -1 (-0.14%)                                                  | -2 (-0.30)        | <b>-3 (-0.48)</b> |
| <b>Consolidated (namino=2)</b> | 6255                     | <b>99.9864</b> | <b>185/25</b>                       | <b>0 (0%)</b>                                                | -3 (-0.45)        | -4 (-0.64)        |
| Consolidated (namino=3)        | 6250                     | 99.9762        | 329/26                              | 1 (0.14%)                                                    | <b>-1 (-0.15)</b> | <b>-4 (-0.48)</b> |

## WETLAB PROCEDURE

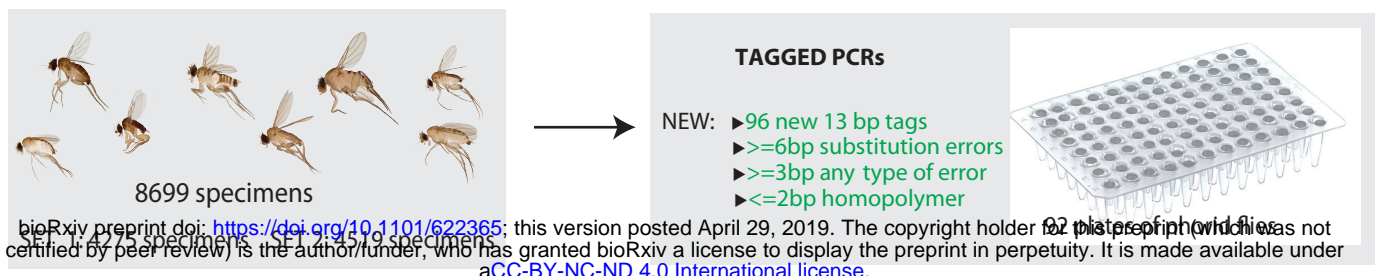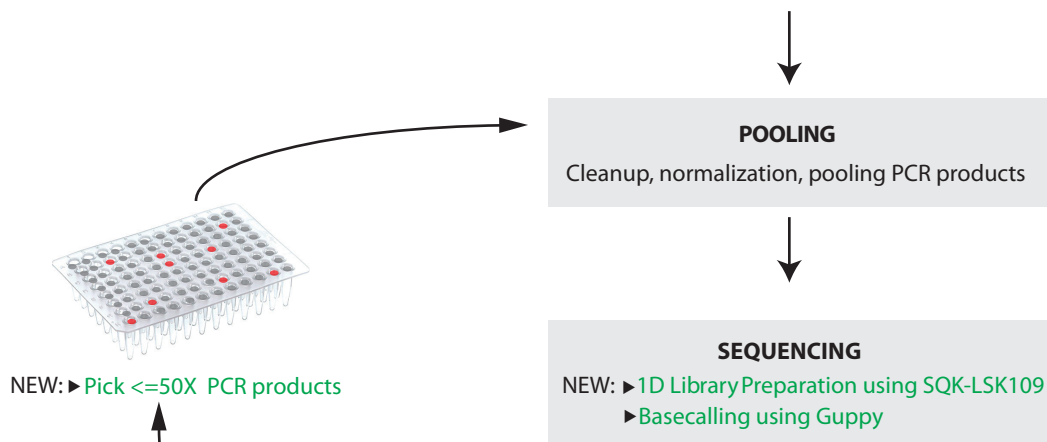

**COVERAGE ESTIMATION**  
(repool\_by\_plate.py)

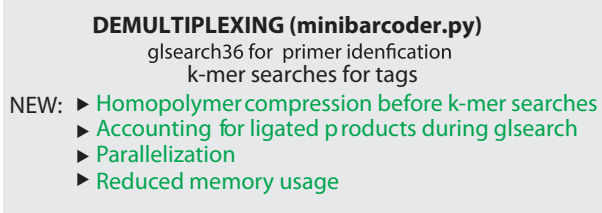

## BARCODE CALLING

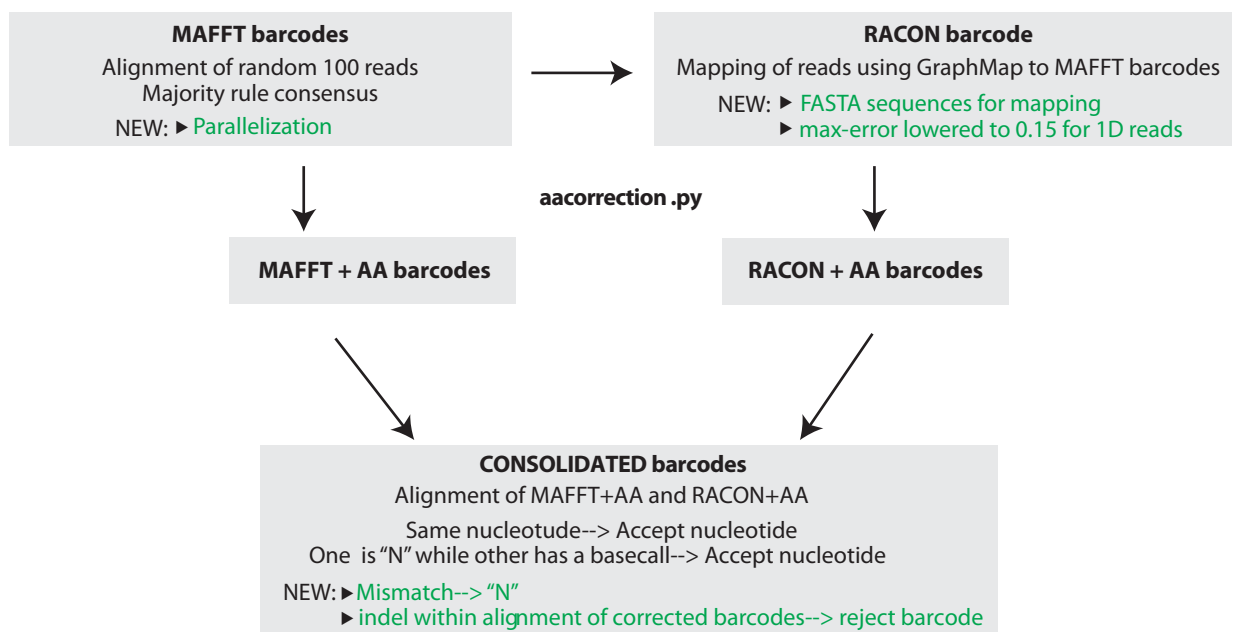

## SPECIES DELIMITATION

**CONTAMINATION CHECK**

**mOTU CLUSTERING**

NEW: ▶ Morphological examination

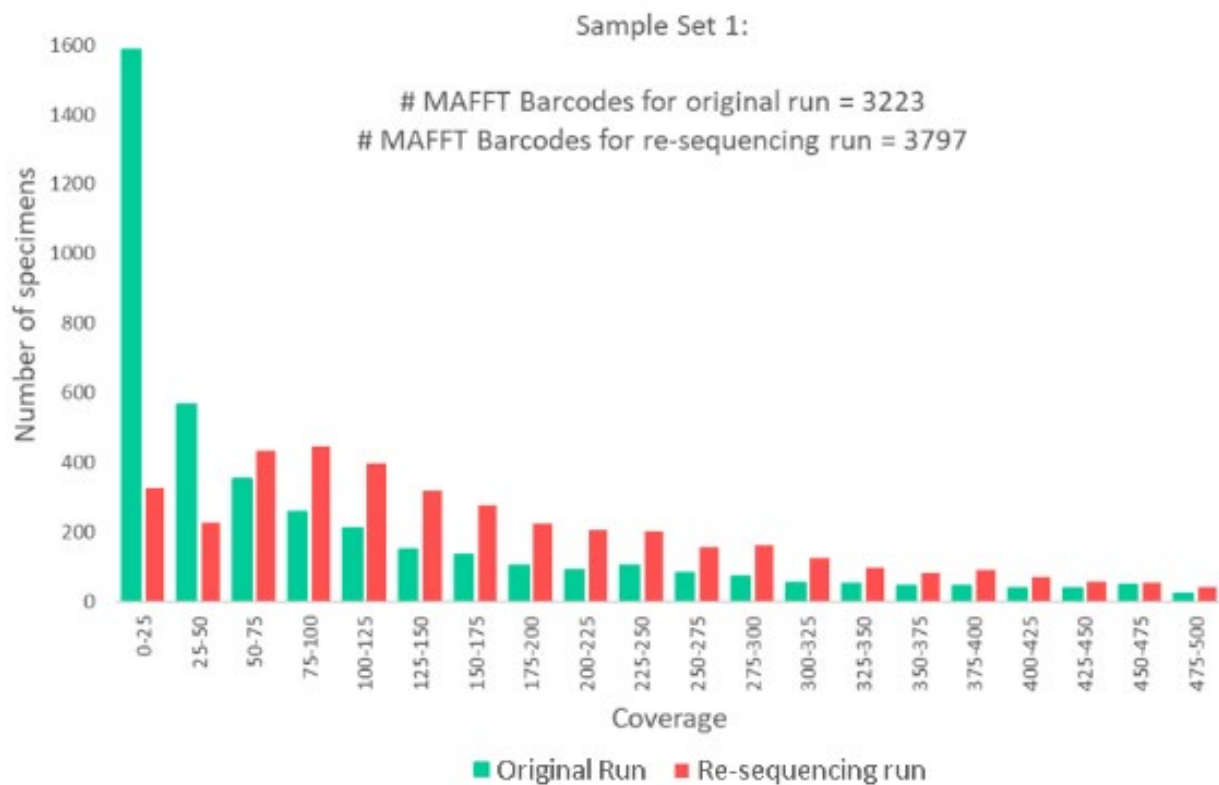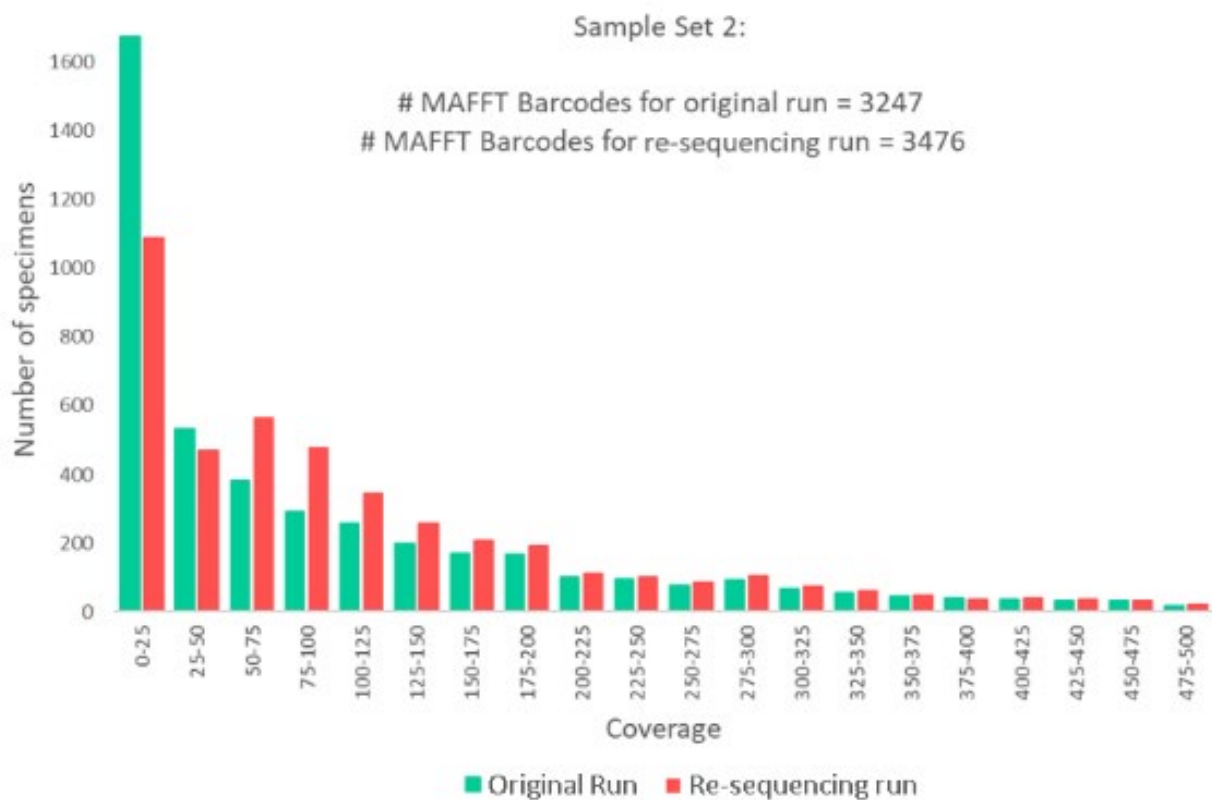

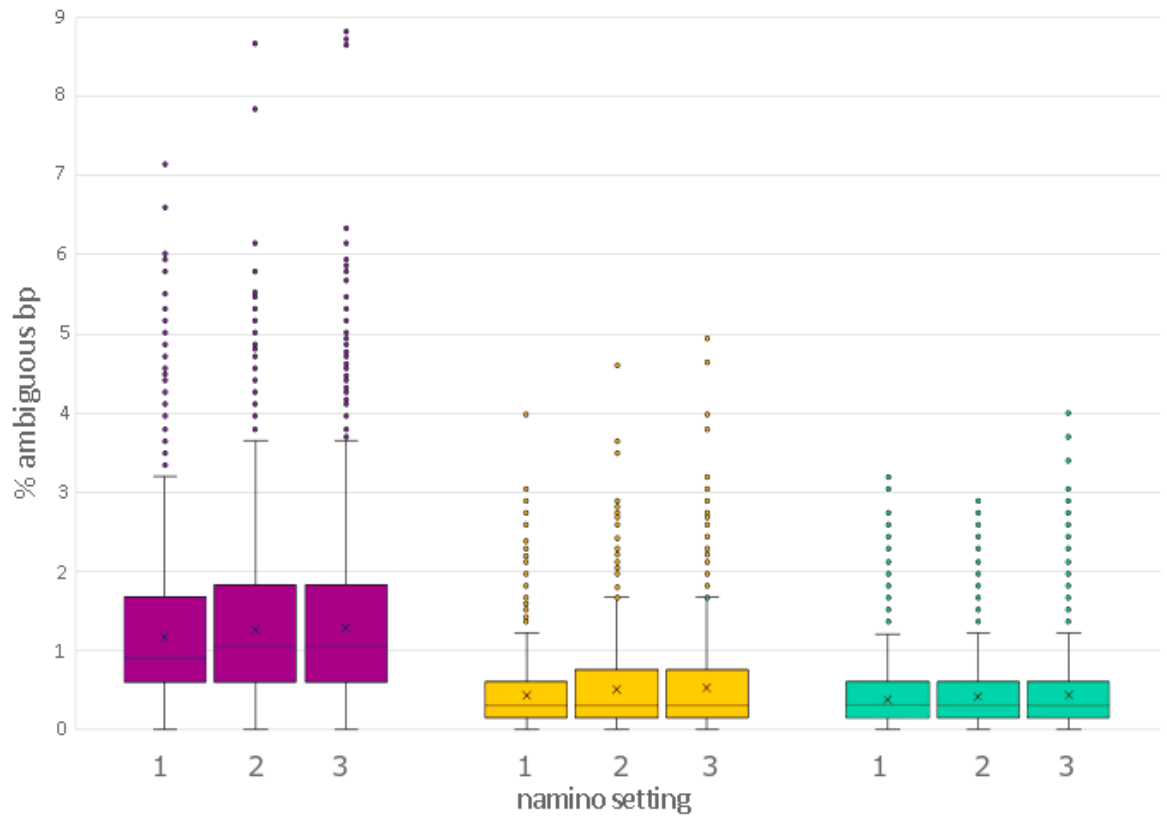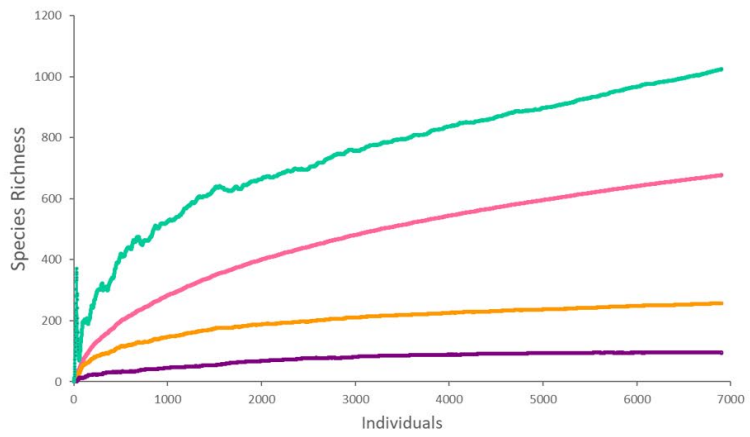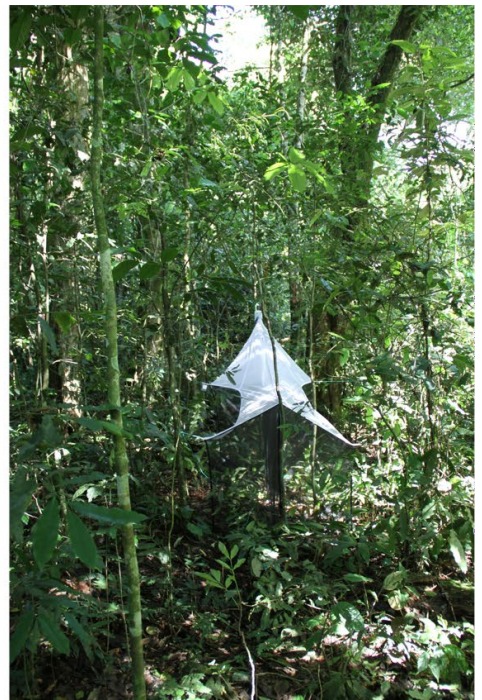



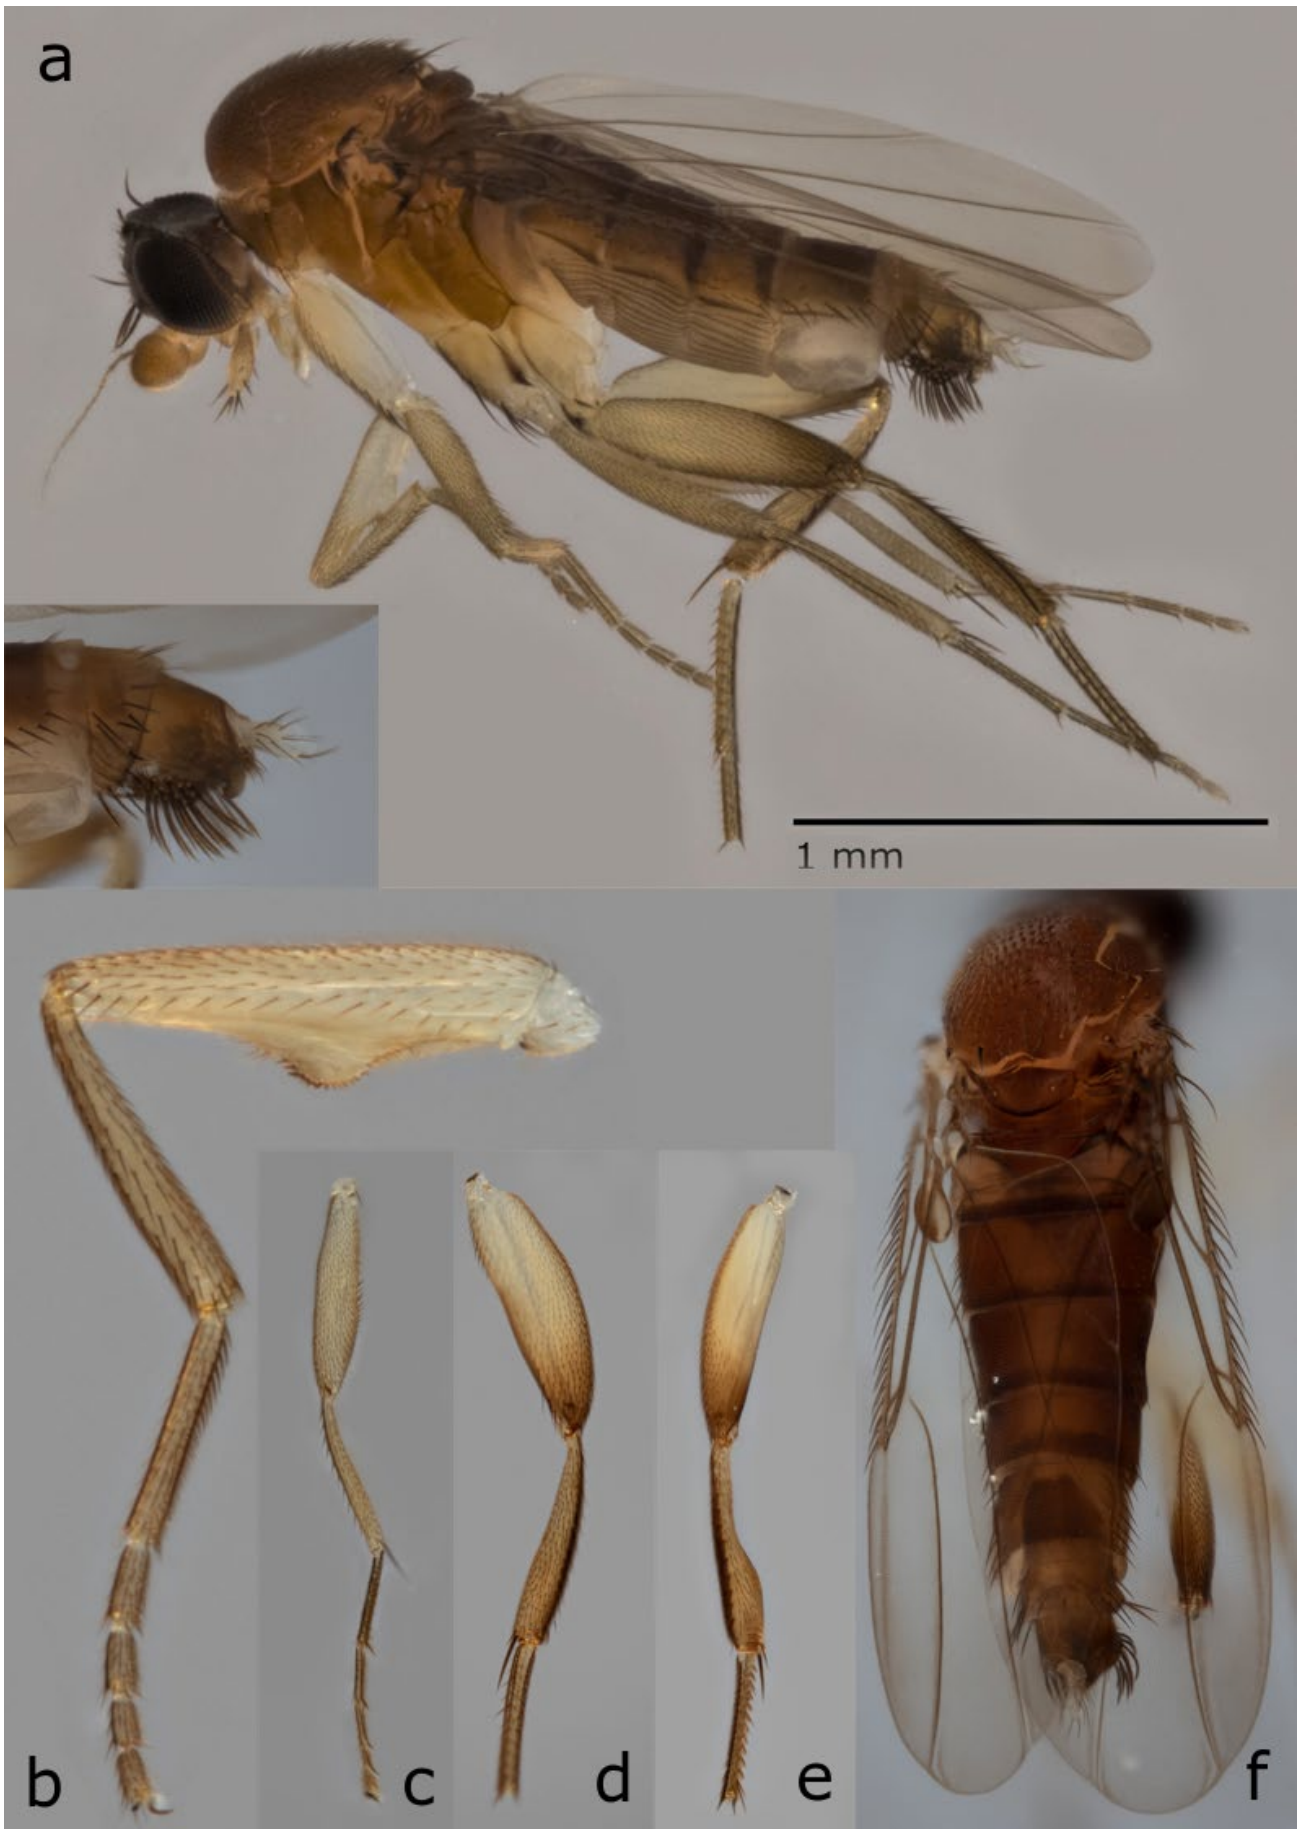

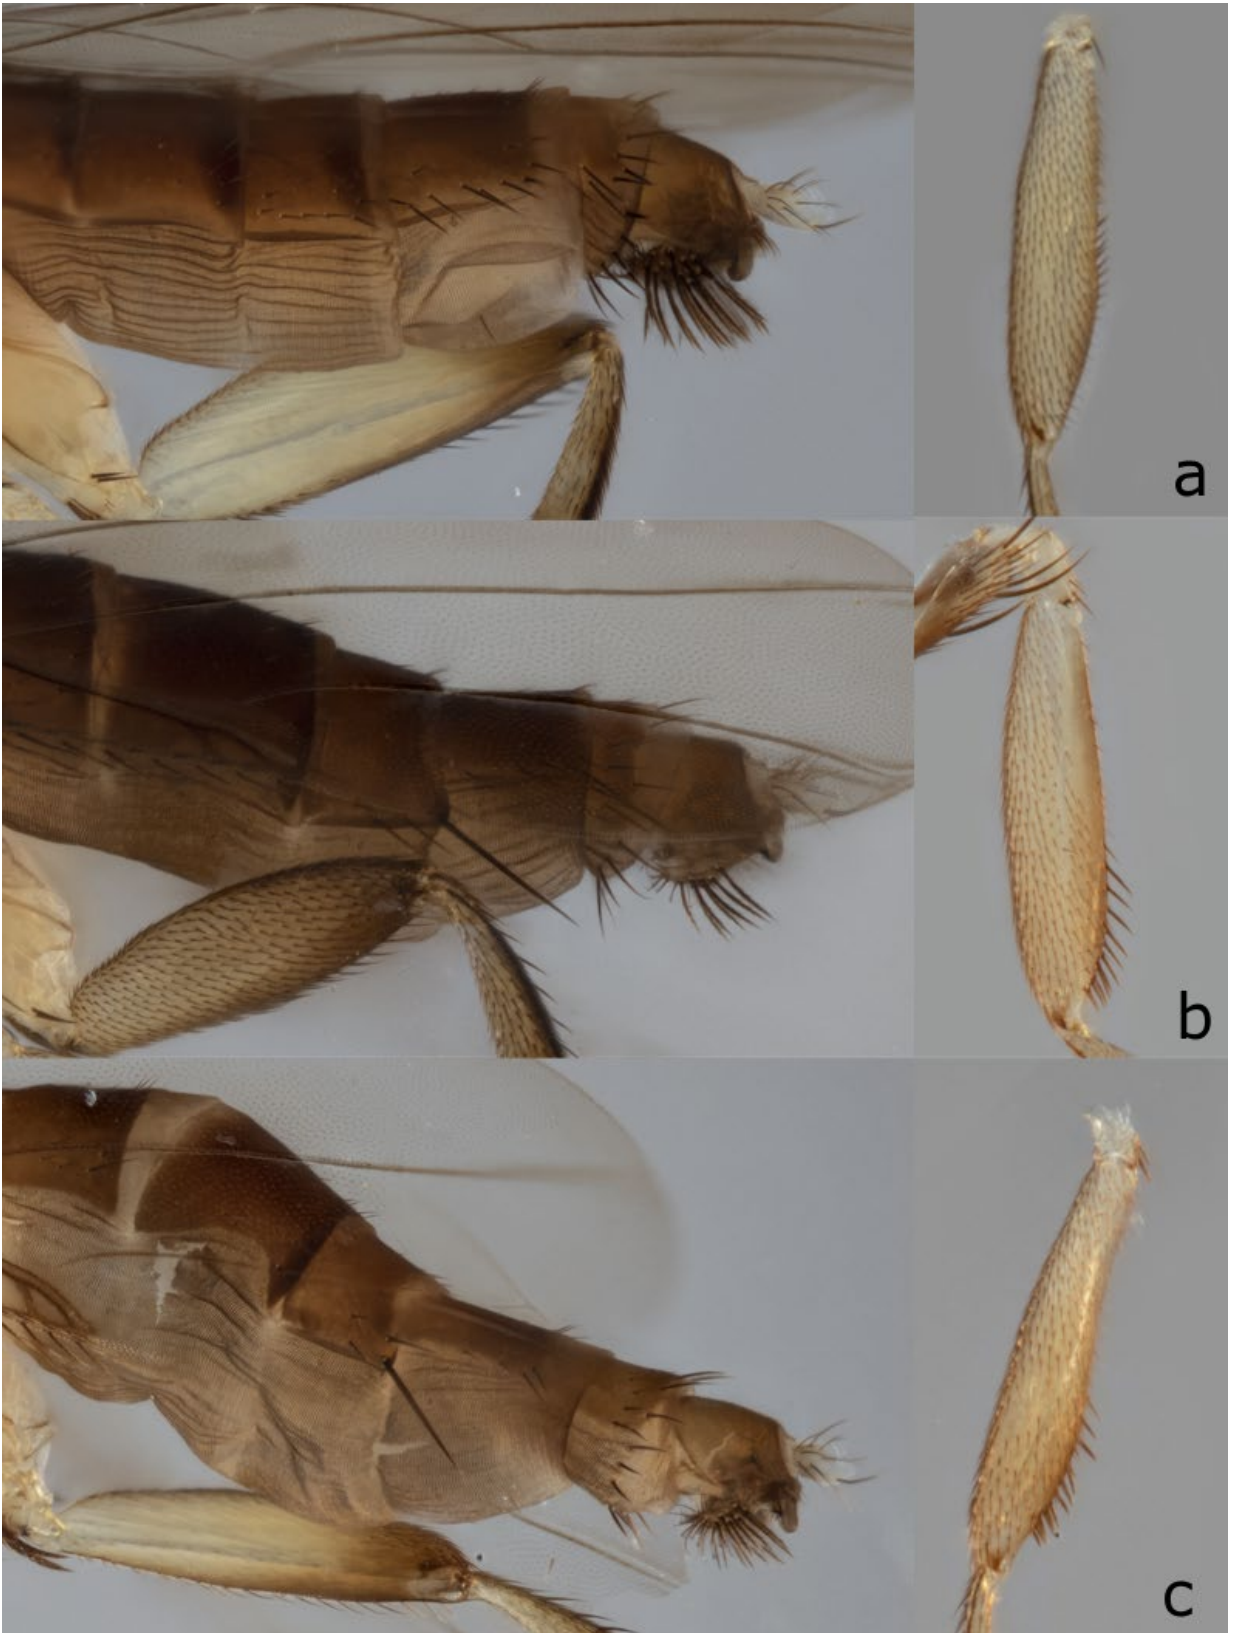



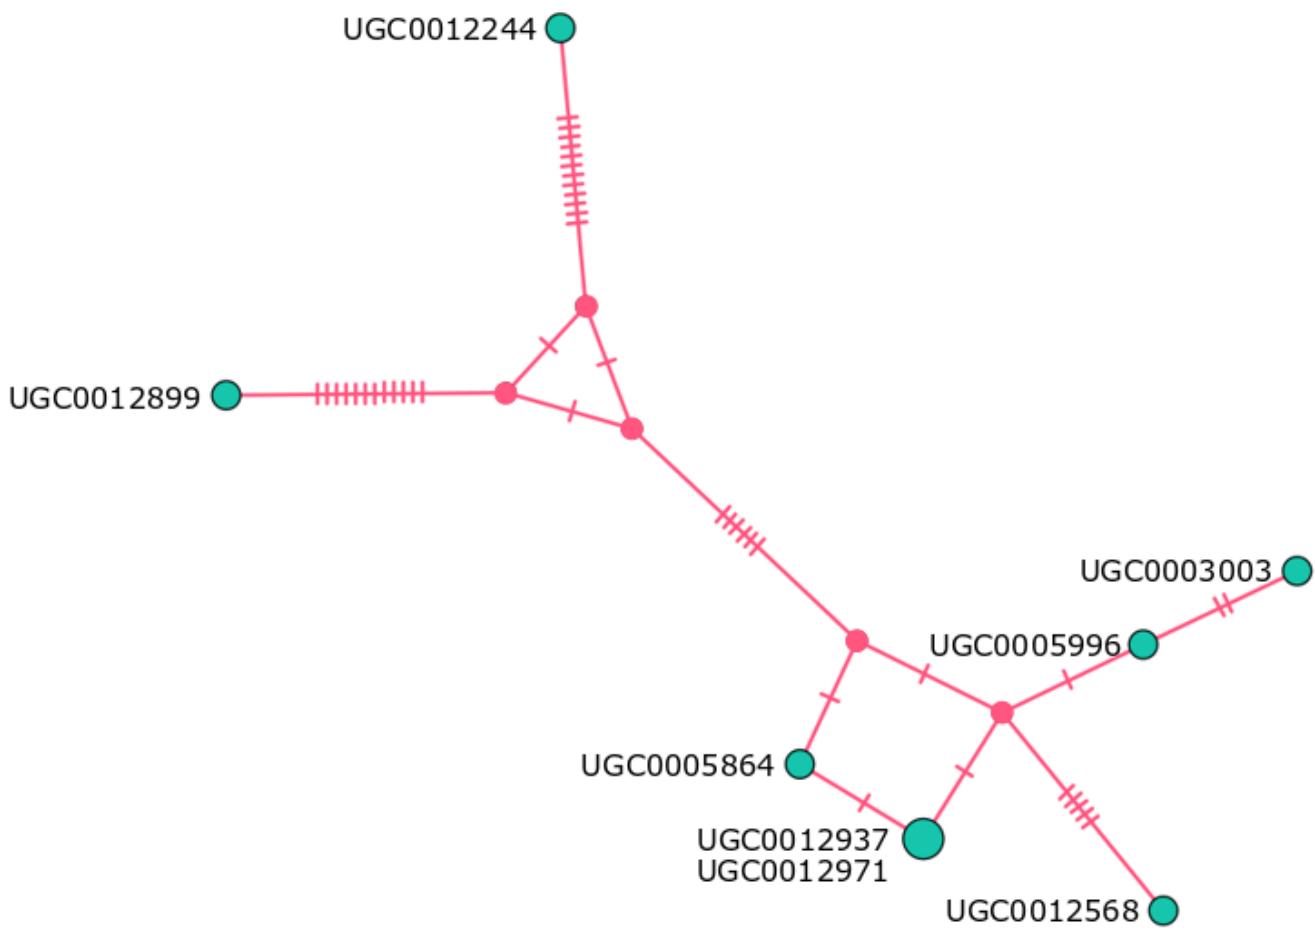

Source: https://www.biorxiv.org/content/10.1101/622365v1.full.pdf
